# Supplementary material for: Near-infrared-triggered photon upconversion tuning in all-inorganic cesium lead halide perovskite quantum dots
Source: PubMed Central journal article supplement (PMC6110834; doi:10.1038/s41467-018-05947-2), 2018-08-27
Supplement: 41467_2018_5947_MOESM1_ESM.pdf [file 41467_2018_5947_MOESM1_ESM.pdf]

# **Near-infrared triggered photon upconversion tuning in all-inorganic cesium lead halide perovskite quantum dots**

Zheng et al.

**Supplementary Note 1: Synthesis of LiYbF<sub>4</sub>:Tm<sup>3+</sup> NPs.** Monodisperse LiYbF<sub>4</sub>:Tm<sup>3+</sup> nanoparticles (NPs) were synthesized through a high-temperature co-precipitation method as we previously reported (Supplementary Ref. 1). In a typical synthesis of LiYbF<sub>4</sub>:0.5%Tm<sup>3+</sup> NPs, 1 mmol of CH<sub>3</sub>COOLi·2H<sub>2</sub>O, 0.995 mmol of Yb(CH<sub>3</sub>COO)<sub>3</sub>·4H<sub>2</sub>O and 0.005 mmol of Tm(CH<sub>3</sub>COO)<sub>3</sub>·4H<sub>2</sub>O were mixed with 8 mL of oleic acid (OA) and 12 mL of trioctylamine (TOA) in a 100 mL three-necked round-bottom flask. The resulting mixture was heated to 160 °C under a N<sub>2</sub> flow with constant stirring for 30 min to form a clear solution, and then cooled down to room temperature. Thereafter, 10 mL of methanol solution containing 4 mmol of NH<sub>4</sub>F was added and the solution was stirred at 60 °C for 30 min to remove methanol. After methanol was evaporated, the resulting solution was heated to 320 °C under a N<sub>2</sub> flow with vigorous stirring for 60 min, and then cooled down to room temperature. The obtained NPs were precipitated by addition of 30 mL of ethanol, collected by centrifugation, washed with ethanol several times, and finally redispersed in cyclohexane. To control the doping concentration of Tm<sup>3+</sup> in the resulting NPs, different amounts of Yb(CH<sub>3</sub>COO)<sub>3</sub>·4H<sub>2</sub>O and Tm(CH<sub>3</sub>COO)<sub>3</sub>·4H<sub>2</sub>O were used in the synthesis under otherwise identical conditions.

**Synthesis of LiYbF<sub>4</sub>:Tm<sup>3+</sup>@LiYF<sub>4</sub> core/shell NPs.** LiYbF<sub>4</sub>:Tm<sup>3+</sup>@LiYF<sub>4</sub> core/shell NPs were synthesized through a seed-mediated growth strategy by using LiYbF<sub>4</sub>:Tm<sup>3+</sup> core-only NPs as the seed. In a typical synthesis, 0.5 mmol of CH<sub>3</sub>COOLi·2H<sub>2</sub>O and 0.5 mmol of Y(CH<sub>3</sub>COO)<sub>3</sub>·4H<sub>2</sub>O were added to a 100 mL three-necked round-bottom flask containing 8 mL of OA and 12 mL of TOA. The mixed solution was then heated to 160 °C under a N<sub>2</sub> flow with constant stirring for 30 min to form a clear solution. After cooling down to 80 °C, 0.5 mmol of LiYbF<sub>4</sub>:Tm<sup>3+</sup> core-only NPs in 10 mL of cyclohexane was added and maintained at 80 °C for 30 min to remove cyclohexane. After the removal of cyclohexane, 10 mL of methanol solution containing 2 mmol of NH<sub>4</sub>F was added and stirred at 60 °C for another 30 min to remove methanol. After methanol was evaporated, the solution was heated to 320 °C under a N<sub>2</sub> flow with vigorous stirring for 60 min, and then cooled down to room temperature. The resulting core/shell NPs were precipitated by addition of 30 mL of ethanol, collected by centrifugation, washed with ethanol several times, and finally redispersed in cyclohexane.

**Supplementary Note 2: Determination of the energy transfer efficiency in NPs-sensitized CsPbX<sub>3</sub> PeQDs.** We defined the efficiency of energy transfer ( $\eta^{\text{ETE}}$ ) from LiYbF<sub>4</sub>:0.5%Tm<sup>3+</sup>@LiYF<sub>4</sub> NPs to CsPbX<sub>3</sub> perovskite quantum dots (PeQDs) as the ratio of the number of emitted photons from Tm<sup>3+</sup> that are absorbed by PeQDs ( $n_{\text{abs}}^x$ ) in NPs-sensitized PeQDs to the number of emitted photons from Tm<sup>3+</sup> ( $n_{\text{em}}^{\text{Tm}}$ ) with frequencies above the band edge of PeQDs in pure LiYbF<sub>4</sub>:0.5%Tm<sup>3+</sup>@LiYF<sub>4</sub> core/shell NPs upon 980 nm continuous-wave (CW) diode laser excitation under identical conditions. Therefore, based on the upconversion luminescence (UCL) spectra, the energy transfer efficiency can be calculated by

$$\eta^{\text{ETE}} = \frac{n_{\text{abs}}^x}{n_{\text{em}}^{\text{Tm}}} = \frac{I_0^{\text{Tm}} - I_x^{\text{Tm}}}{I_0^{\text{Tm}}}$$

where  $I_0^{\text{Tm}}$  and  $I_x^{\text{Tm}}$  represent the integrated intensity of the UCL of Tm<sup>3+</sup> from the NPs with frequencies above the band edge of CsPbX<sub>3</sub> in the absence and presence of CsPbX<sub>3</sub> PeQDs, respectively. Note that the ultraviolet (UV) emissions from Tm<sup>3+</sup> at 289 nm in pure NPs were also integrated for calculation, though that they were totally quenched in NPs-sensitized PeQDs.

**Supplementary Note 3: Determination of the absolute UCQYs.** The absolute upconversion quantum yields (QYs) were measured on a customized absolute upconversion QY (UCQY) measurement system combined with a fiber optic spectrometer (QE65pro, Ocean Optics), a standard barium sulfate coated integrating sphere (150 mm in diameter, Edinburgh), a 980 nm CW diode laser (MDL-III-980-2W, Changchun New Industries Optoelectronics Tech Co., Ltd.) as the excitation source, and a neutral density filter to attenuate the excitation light. The measurement was conducted deliberately according to the protocols reported by van Veggel and U. R. Genger *et al.* (Supplementary Ref. 2 and 3). The integrating sphere was mounted on the optical platform with the entry and output ports of the sphere located in 90° geometry from each other. All the solution samples of the NPs and PeQDs were mounted in a quartz cuvette located in the center of the integrating sphere. Pure cyclohexane solution for reference were mounted in another quartz cuvette in the integrating sphere with a distance of 1 cm away from the samples. Samples were excited with a 980 nm CW diode laser. An optical lens was used to collimate the laser beam and direct on the sample with a focus of 1 mm<sup>2</sup> and a laser powermeter (Model 1918-C, Newport) was applied to

measure the excitation power on the sample. The absorption of the samples at 980 nm was measured by changing the position of the samples and the reference, and calculated by their difference of the corrected excitation spectra. Baffles were employed on both sides of the sample holder to ensure that no scattered excitation or emission light would be collected before scattering off the inside of the sphere. All the spectroscopic data collected were corrected for the spectral response of both the spectrometer and the integrating sphere. The response of the detection systems in photon flux (integrating sphere, monochromators, and detectors) was determined using a calibrated tungsten lamp (100 W, Edinburgh). The normalization curves were then applied to all measured spectra. The UCQYs were then calculated by (Supplementary Ref. 2)

$$QY = \frac{N^e}{N^a} = \frac{L^S}{E^R - E^S}$$

where  $N^e$  and  $N^a$  are the photons emitted and absorbed, respectively;  $L^S$  is the emission intensity,  $E^R$  and  $E^S$  are the intensities of the excitation light in the presence of the reference and the samples, respectively. The upconversion emission peaks in the spectral region of 330-740 nm were integrated for the QY determination. All the UCQYs for each sample were measured independently for three times under identical conditions to yield the average value and standard deviation.

**Supplementary Table 1.** Photoluminescence (PL) parameters of CsPbX<sub>3</sub> PeQDs with varying halide compositions upon UV excitation at 360 nm: emission peak wavelength, full-width at half maximum (FWHM), and absolute PLQY. The absolute PLQYs for each sample were measured independently for three times under identical conditions to yield the average value and standard deviation.

| Sample                                  | Emission Peak (nm) | FWHM (nm) | PLQY (%)   |
|-----------------------------------------|--------------------|-----------|------------|
| CsPbCl <sub>3</sub>                     | 410                | 11.7      | 26.0 ± 0.3 |
| CsPbCl <sub>2</sub> Br <sub>1</sub>     | 444                | 15.5      | 35.6 ± 0.4 |
| CsPbCl <sub>1.5</sub> Br <sub>1.5</sub> | 464                | 16.3      | 61.8 ± 0.4 |
| CsPbCl <sub>1</sub> Br <sub>2</sub>     | 481                | 17.9      | 61.4 ± 0.8 |
| CsPbBr <sub>3</sub>                     | 520                | 20.3      | 79.8 ± 0.9 |
| CsPbBr <sub>2</sub> I <sub>1</sub>      | 587                | 28.2      | 71.2 ± 0.5 |
| CsPbBr <sub>1.5</sub> I <sub>1.5</sub>  | 631                | 29.4      | 62.7 ± 0.2 |
| CsPbBr <sub>1</sub> I <sub>2</sub>      | 660                | 29.9      | 58.5 ± 0.7 |
| CsPbI <sub>3</sub>                      | 700                | 37.0      | 57.5 ± 0.4 |

**Supplementary Table 2.** Effective PL lifetimes of CsPbX<sub>3</sub> PeQDs with varying halide compositions upon excitation with a 397 nm picosecond pulsed laser.  $\tau^{\text{eff}}$  was calculated by

$$\tau^{\text{eff}} = \frac{1}{I^{\text{max}}} \int_0^{\infty} I(t) dt,$$

where  $I(t)$  denotes the PL intensity as a function of time  $t$ , and  $I^{\text{max}}$  is the maximum PL intensity. The errors of the lifetimes are smaller than 5%.

| Samples                                 | $\tau^{\text{eff}}$ (ns) | Samples                             | $\tau^{\text{eff}}$ (ns) | Samples                                | $\tau^{\text{eff}}$ (ns) |
|-----------------------------------------|--------------------------|-------------------------------------|--------------------------|----------------------------------------|--------------------------|
| CsPbCl <sub>3</sub>                     | 1.8                      | CsPbCl <sub>1</sub> Br <sub>2</sub> | 8.2                      | CsPbBr <sub>1.5</sub> I <sub>1.5</sub> | 66.2                     |
| CsPbCl <sub>2</sub> Br <sub>1</sub>     | 3.8                      | CsPbBr <sub>3</sub>                 | 21.1                     | CsPbBr <sub>1</sub> I <sub>2</sub>     | 75.0                     |
| CsPbCl <sub>1.5</sub> Br <sub>1.5</sub> | 8.9                      | CsPbBr <sub>2</sub> I <sub>1</sub>  | 41.1                     | CsPbI <sub>3</sub>                     | 81.1                     |

**Supplementary Table 3.** Chromaticity coordinates (CIE, 1931) for the UCL from pure  $\text{LiYbF}_4:0.5\%\text{Tm}^{3+}@ \text{LiYF}_4$  core/shell NPs and NPs-sensitized  $\text{CsPbX}_3$  PeQDs with varying halide compositions under 980 nm CW diode laser excitation at a power density of  $50 \text{ W cm}^{-2}$ . Chromaticity coordinates for the blue emission from  $\text{CsPbCl}_{1.5}\text{Br}_{1.5}$ , green emission from  $\text{CsPbBr}_3$ , and red emission from  $\text{CsPbBr}_{1.5}\text{I}_{1.5}$  under 360 nm excitation were also outlined for comparison.

| Sample                                    | $x$   | $y$   | Sample                                          | $x$   | $y$   |
|-------------------------------------------|-------|-------|-------------------------------------------------|-------|-------|
| pure NPs                                  | 0.154 | 0.071 | NPs/ $\text{CsPbBr}_{1.5}\text{I}_{1.5}$        | 0.677 | 0.320 |
| NPs/ $\text{CsPbCl}_3$                    | 0.155 | 0.063 | NPs/ $\text{CsPbBr}_1\text{I}_2$                | 0.716 | 0.281 |
| NPs/ $\text{CsPbCl}_{1.5}\text{Br}_{1.5}$ | 0.129 | 0.091 | NPs/ $\text{CsPbI}_3$                           | 0.711 | 0.273 |
| NPs/ $\text{CsPbCl}_1\text{Br}_2$         | 0.076 | 0.341 | $\text{CsPbBr}_3$ (green, PL)                   | 0.112 | 0.787 |
| NPs/ $\text{CsPbBr}_3$                    | 0.135 | 0.734 | $\text{CsPbCl}_{1.5}\text{Br}_{1.5}$ (blue, PL) | 0.134 | 0.053 |
| NPs/ $\text{CsPbBr}_2\text{I}_1$          | 0.507 | 0.485 | $\text{CsPbBr}_{1.5}\text{I}_{1.5}$ (red, PL)   | 0.689 | 0.311 |

**Supplementary Table 4.** Calculated energy transfer efficiency ( $\eta^{\text{ETE}}$ ) in NPs-sensitized CsPbX<sub>3</sub> PeQDs with varying halide compositions under 980 nm CW diode laser excitation at a power density of 50 W cm<sup>-2</sup>.

| Composition                             | $\eta^{\text{ETE}}$ | Composition                            | $\eta^{\text{ETE}}$ |
|-----------------------------------------|---------------------|----------------------------------------|---------------------|
| CsPbCl <sub>3</sub>                     | 65.5%               | CsPbBr <sub>2</sub> I <sub>1</sub>     | 98.2%               |
| CsPbCl <sub>1.5</sub> Br <sub>1.5</sub> | 94.4%               | CsPbBr <sub>1.5</sub> I <sub>1.5</sub> | 99.3%               |
| CsPbCl <sub>1</sub> Br <sub>2</sub>     | 96.8%               | CsPbBr <sub>1</sub> I <sub>2</sub>     | 99.8%               |
| CsPbBr <sub>3</sub>                     | 96.6%               | CsPbI <sub>3</sub>                     | 99.9%               |



**Supplementary Table 5.** UCQYs for pure  $\text{LiYbF}_4:0.5\%\text{Tm}^{3+}@\text{LiYF}_4$  core/shell NPs and NPs-sensitized  $\text{CsPbX}_3$  PeQDs with varying halide compositions under 980 nm CW diode laser excitation at a power density of  $100 \text{ W cm}^{-2}$ . For comparison, UCQYs of the UV, blue, and red emissions of  $\text{Tm}^{3+}$  from the NPs and the upconverted exciton emissions from PeQDs were calculated, respectively. All UCQYs were measured independently for three times under identical conditions to yield the average value and standard deviation.

| Sample                                    | Emission group            | Integrated spectral region (nm) | UCQY (%)        |
|-------------------------------------------|---------------------------|---------------------------------|-----------------|
| Pure NPs                                  | UV                        | 330-400                         | $0.15 \pm 0.04$ |
|                                           | blue                      | 430-530                         | $0.29 \pm 0.07$ |
|                                           | red                       | 630-700                         | $0.05 \pm 0.01$ |
|                                           | overall                   | 330-700                         | $0.49 \pm 0.13$ |
| NPs/ $\text{CsPbCl}_3$                    | UV ( $\text{Tm}^{3+}$ )   | 330-380                         | $0.08 \pm 0.02$ |
|                                           | violet (exciton)          | 380-435                         | $0.06 \pm 0.01$ |
|                                           | blue ( $\text{Tm}^{3+}$ ) | 435-530                         | $0.26 \pm 0.03$ |
|                                           | red ( $\text{Tm}^{3+}$ )  | 630-700                         | $0.05 \pm 0.01$ |
|                                           | overall                   | 330-700                         | $0.44 \pm 0.07$ |
| NPs/ $\text{CsPbCl}_{1.5}\text{Br}_{1.5}$ | blue (exciton)            | 400-530                         | $0.35 \pm 0.07$ |
|                                           | red ( $\text{Tm}^{3+}$ )  | 630-700                         | $0.06 \pm 0.01$ |
|                                           | overall                   | 400-700                         | $0.41 \pm 0.08$ |
| NPs/ $\text{CsPbCl}_1\text{Br}_2$         | blue (exciton)            | 420-530                         | $0.40 \pm 0.10$ |
|                                           | red ( $\text{Tm}^{3+}$ )  | 630-700                         | $0.05 \pm 0.01$ |
|                                           | overall                   | 420-700                         | $0.45 \pm 0.11$ |
| NPs/ $\text{CsPbBr}_3$                    | green (exciton)           | 430-580                         | $0.39 \pm 0.08$ |
|                                           | red ( $\text{Tm}^{3+}$ )  | 630-700                         | $0.06 \pm 0.02$ |
|                                           | overall                   | 430-700                         | $0.45 \pm 0.10$ |
| NPs/ $\text{CsPbBr}_2\text{I}_1$          | yellow (exciton)          | 520-630                         | $0.39 \pm 0.11$ |
|                                           | red ( $\text{Tm}^{3+}$ )  | 630-700                         | $0.04 \pm 0.02$ |
|                                           | overall                   | 520-700                         | $0.43 \pm 0.13$ |
| NPs/ $\text{CsPbBr}_{1.5}\text{I}_{1.5}$  | red (exciton, overall)    | 560-720                         | $0.33 \pm 0.06$ |
| NPs/ $\text{CsPbBr}_1\text{I}_2$          | red (exciton, overall)    | 570-720                         | $0.33 \pm 0.11$ |
| NPs/ $\text{CsPbI}_3$                     | red (exciton, overall)    | 630-740                         | $0.36 \pm 0.09$ |

**Supplementary Table 6.** UCL lifetimes of  $^1I_6$ ,  $^1D_2$ ,  $^1G_4$ , and  $^3H_4$  of  $Tm^{3+}$  in pure  $LiYbF_4:x\%Tm^{3+}@LiYF_4$  core/shell NPs and UCL lifetimes of the upconverted excitons from NPs-sensitized  $CsPbX_3$  PeQDs with varying halide compositions of PeQDs and  $Tm^{3+}$  concentrations of the NPs. The UCL lifetimes were obtained by single-exponential fitting to the decay curves. For non-exponential decay, the effective UCL lifetime was calculated by

$$\tau^{eff} = \frac{1}{I^{max}} \int_0^{\infty} I(t) dt$$

where  $I(t)$  denotes the UCL intensity as a function of time  $t$ , and  $I^{max}$  represents the maximum UCL intensity.

The errors of all lifetimes are smaller than 5%.

| Transition                         | Emission (nm) | $\tau$ ( $\mu$ s) / $x\%$ $Tm^{3+}$ |     |     |     |     |
|------------------------------------|---------------|-------------------------------------|-----|-----|-----|-----|
|                                    |               | 0.1                                 | 0.3 | 0.5 | 1   | 3   |
| $Tm^{3+}: ^1I_6 \rightarrow ^3F_4$ | 347           | 473                                 | 335 | 217 | 119 | 60  |
| $Tm^{3+}: ^1D_2 \rightarrow ^3H_6$ | 362           | 553                                 | 390 | 253 | 130 | 61  |
| $Tm^{3+}: ^1G_4 \rightarrow ^3H_6$ | 483           | 803                                 | 622 | 447 | 257 | 119 |
| $Tm^{3+}: ^3H_4 \rightarrow ^3H_6$ | 792           | 1205                                | 928 | 601 | 255 | 154 |
| $CsPbCl_3$                         | 410           | 494                                 | 350 | 229 | 126 | 61  |
| $CsPbCl_{1.5}Br_{1.5}$             | 467           | 978                                 | 719 | 398 | 196 | 79  |
| $CsPbCl_1Br_2$                     | 489           | 775                                 | 578 | 392 | 196 | 81  |
| $CsPbBr_3$                         | 520           | 794                                 | 587 | 389 | 191 | 81  |
| $CsPbBr_2I_1$                      | 580           | 742                                 | 618 | 437 | 299 | 198 |
| $CsPbBr_{1.5}I_{1.5}$              | 630           | 840                                 | 656 | 443 | 226 | 100 |
| $CsPbBr_1I_2$                      | 657           | 727                                 | 572 | 438 | 282 | 243 |
| $CsPbI_3$                          | 700           | 1053                                | 773 | 416 | 199 | 80  |

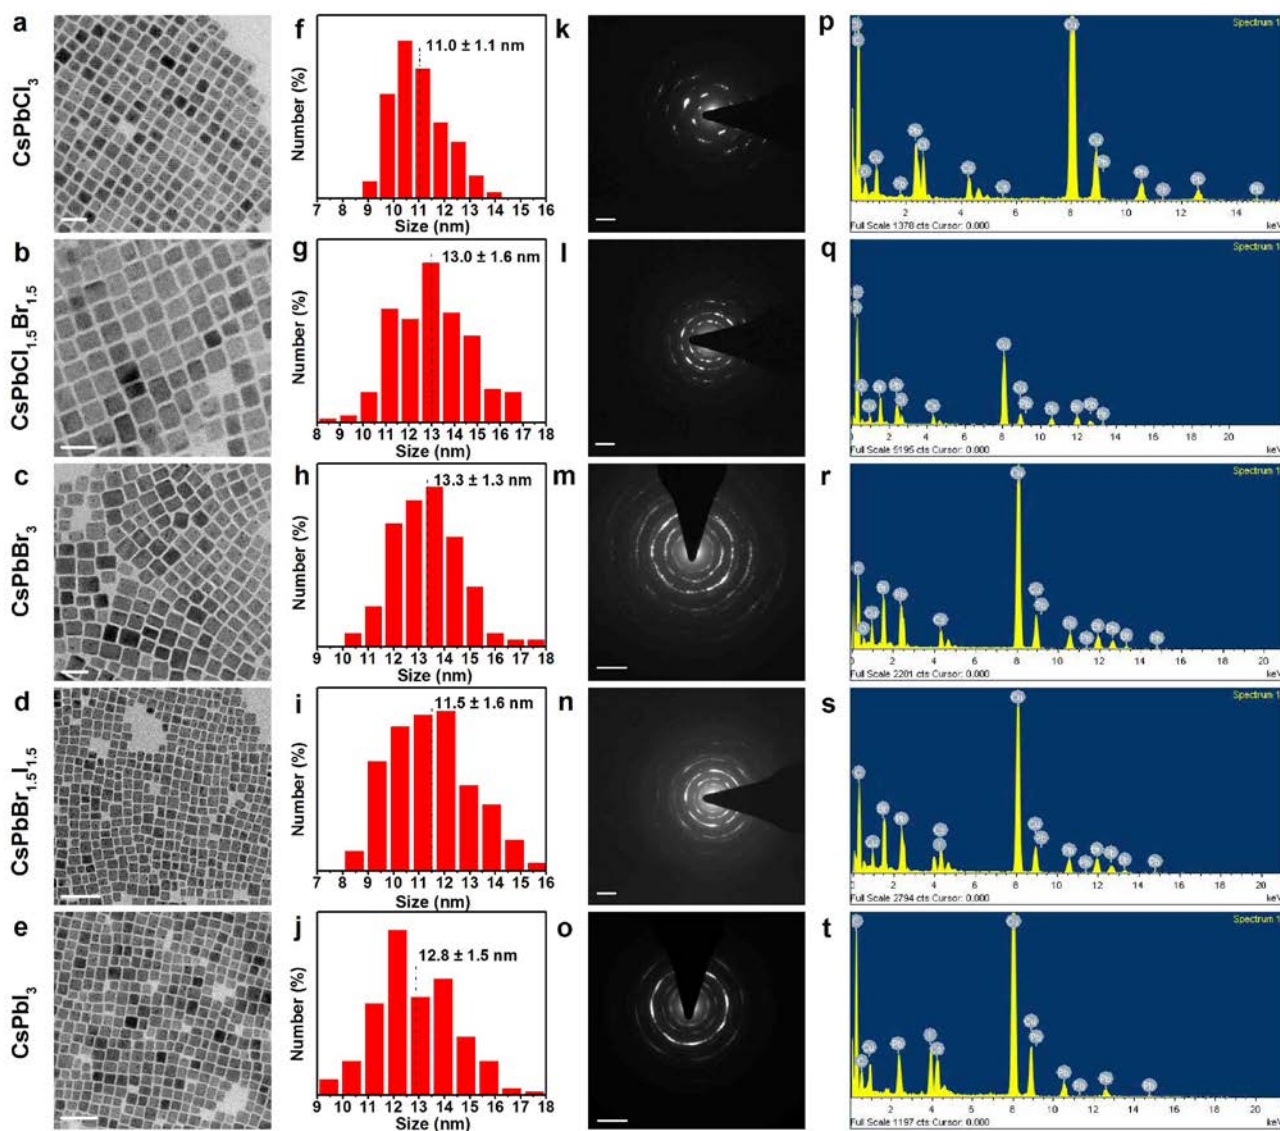

**Supplementary Figure 1.** **a-e** Transmission electron microscopy (TEM) images, **f-j** size distributions, **k-o** selected area electron diffraction (SAED) patterns, and **p-t** energy dispersive X-ray spectra of CsPbX<sub>3</sub> PeQDs with varying halide compositions. The scale bars in **(a-c)** and **(d, e)** represent 20 nm and 50 nm, respectively, and the scale bars in **(k-o)** are 2 nm<sup>-1</sup>. TEM images showed that all PeQDs were roughly cubic with average lengths of 11.0-13.3 nm. The strong SAED ring patterns verified high crystallinity of the PeQDs. Energy dispersive X-ray spectra confirmed the elements of Cs, Pb, and X (X = Cl, Br, and I) in CsPbX<sub>3</sub> PeQDs. The size distributions were obtained by randomly calculating 200 particles in the TEM images.

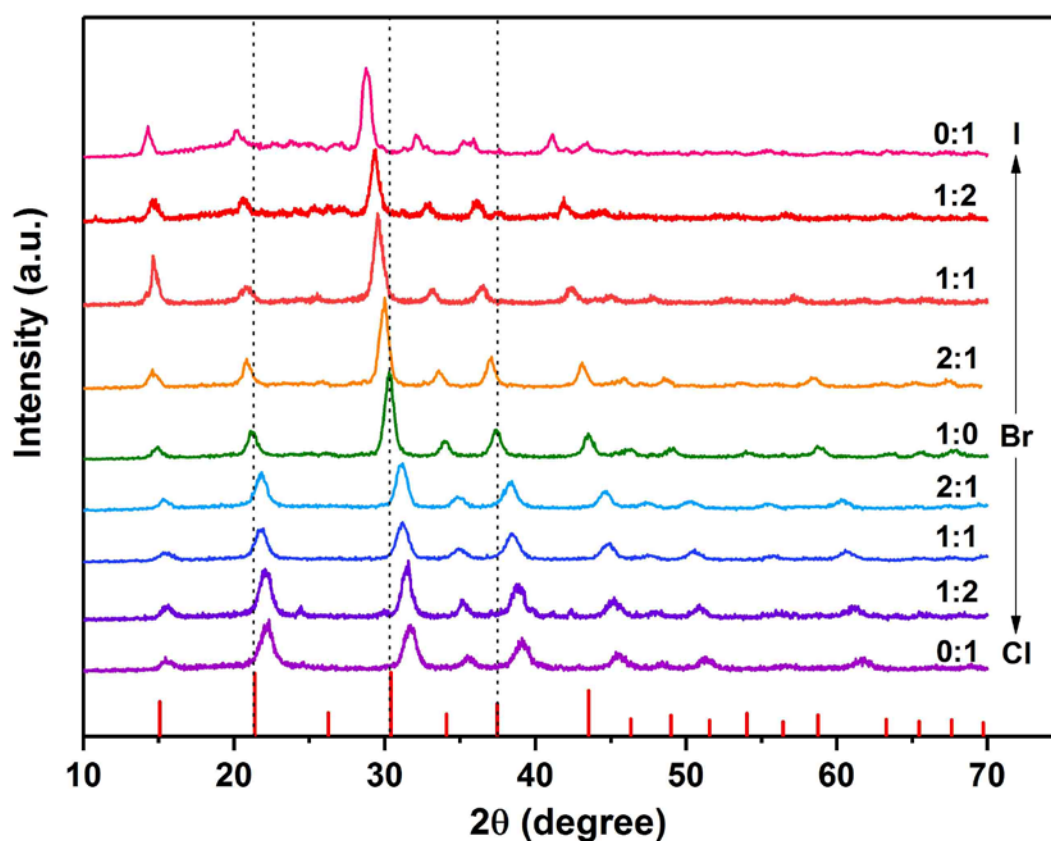

**Supplementary Figure 2.** X-ray powder diffraction (XRD) patterns of CsPbX<sub>3</sub> PeQDs with varying halide compositions. All the diffraction peaks matched well with the standard pattern of cubic CsPbBr<sub>3</sub> (JCPDS No. 75-0412), indicating pure phase and high crystallinity of the resulting PeQDs. A shift in the diffraction peaks toward lower angle was explicitly observed when the halide composition changed from Cl<sup>-</sup> to Br<sup>-</sup> and I<sup>-</sup>, which can be ascribed to lattice expansion of PeQDs arising from the increased ionic radius of halide from Cl<sup>-</sup> to I<sup>-</sup>.

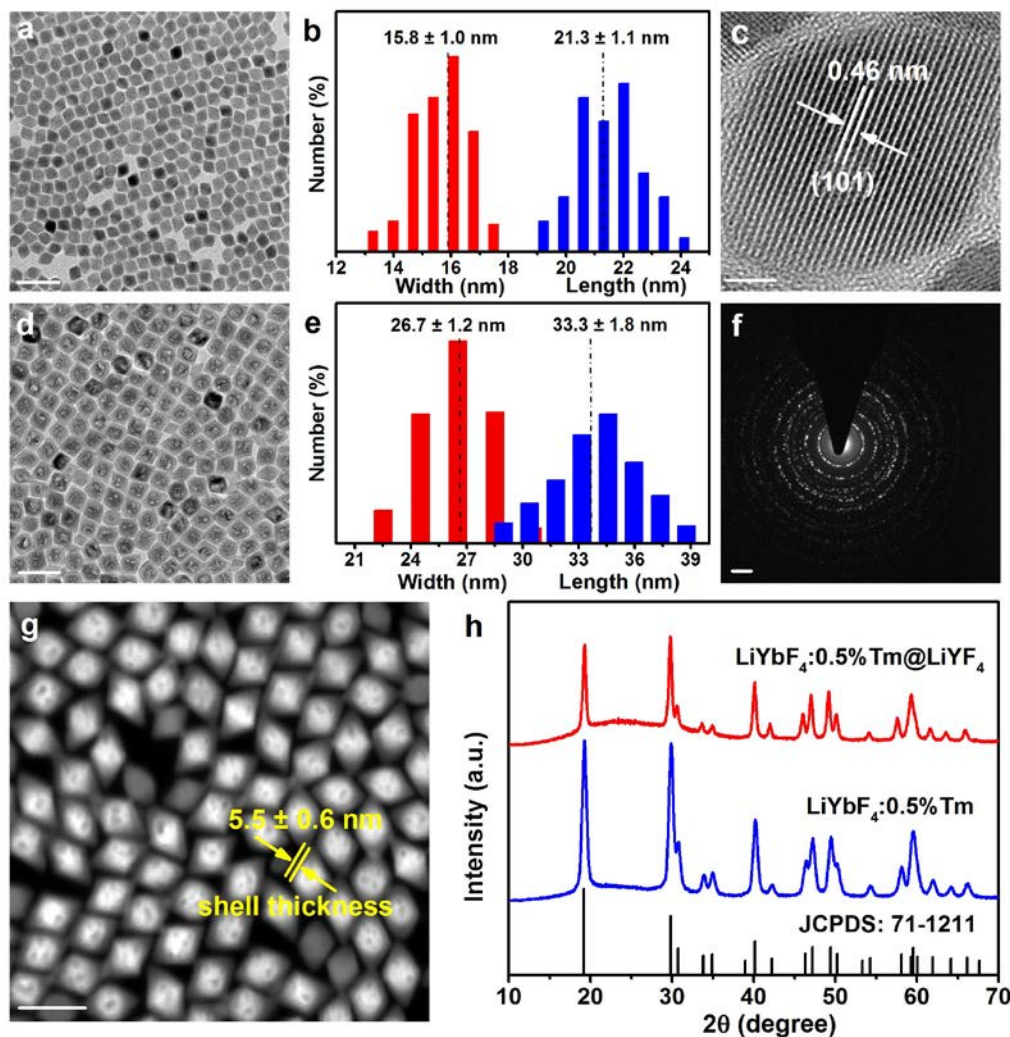

**Supplementary Figure 3.** **a** TEM image and **b** size distribution of  $\text{LiYbF}_4:0.5\% \text{Tm}^{3+}$  core-only NPs. **c** High-resolution TEM image, **d** TEM image, **e** size distribution, **f** SAED pattern, and **g** high-angle annular dark-field scanning TEM (HAADF-STEM) image of  $\text{LiYbF}_4:0.5\% \text{Tm}^{3+} @ \text{LiYF}_4$  core/shell NPs. The scale bars in (**a**, **c**, **d**, **f**, **g**) represent 50 nm, 5 nm, 50 nm,  $2 \text{ nm}^{-1}$ , and 50 nm, respectively. **h** XRD patterns of  $\text{LiYbF}_4:0.5\% \text{Tm}^{3+}$  core-only and  $\text{LiYbF}_4:0.5\% \text{Tm}^{3+} @ \text{LiYF}_4$  core/shell NPs. All diffraction peaks matched well with the standard pattern of tetragonal  $\text{LiYbF}_4$  (JCPDS No. 71-1211), indicating pure phase and high crystallinity of the NPs. TEM images showed that both core-only and core/shell NPs were rhombohedral with their mean sizes of  $(15.8 \pm 1.0) \times (21.3 \pm 1.3) \text{ nm}$  and  $(26.7 \pm 1.2) \times (33.3 \pm 1.8) \text{ nm}$ , respectively. HAADF-STEM image showed a discernible contrasted core/shell structure with a shell thickness of  $5.5 \pm 0.6 \text{ nm}$ , where the brighter regions correspond to the heavier  $\text{Yb}^{3+}$  ions in the cores, and the darker regions correspond to the lighter  $\text{Y}^{3+}$  ions in the shells. The high crystallinity of the NPs was confirmed by the intense SAED ring patterns and the high-resolution TEM image which exhibited clear lattice fringes with an observed d spacing of 0.46 nm for (101) plane of tetragonal  $\text{LiYbF}_4$ .

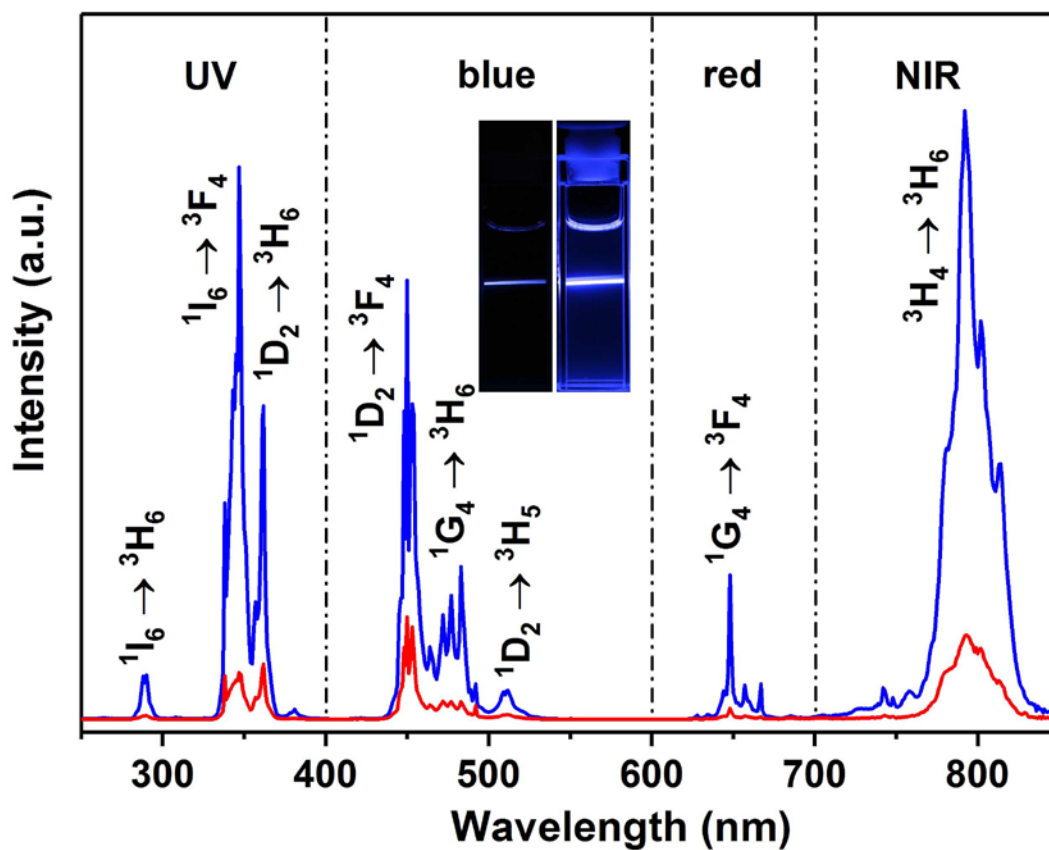

**Supplementary Figure 4.** UCL spectra of  $\text{LiYbF}_4:0.5\%\text{Tm}^{3+}$  core-only (red) and  $\text{LiYbF}_4:0.5\%\text{Tm}^{3+}@ \text{LiYF}_4$  core/shell (blue) NPs under 980 nm excitation with a CW diode laser at a power density of  $50 \text{ W cm}^{-2}$ . The insets show the corresponding UCL photographs for the colloidal cyclohexane solution of the NPs ( $\sim 1 \text{ mg mL}^{-1}$ ) under 980 nm diode laser irradiation. Through surface passivation by growing an inert  $\text{LiYF}_4$  shell, the integrated UCL intensity of the core/shell NPs was enhanced by a factor of 5.9 relative to their core-only counterparts, due to the decreased surface quenching effect.

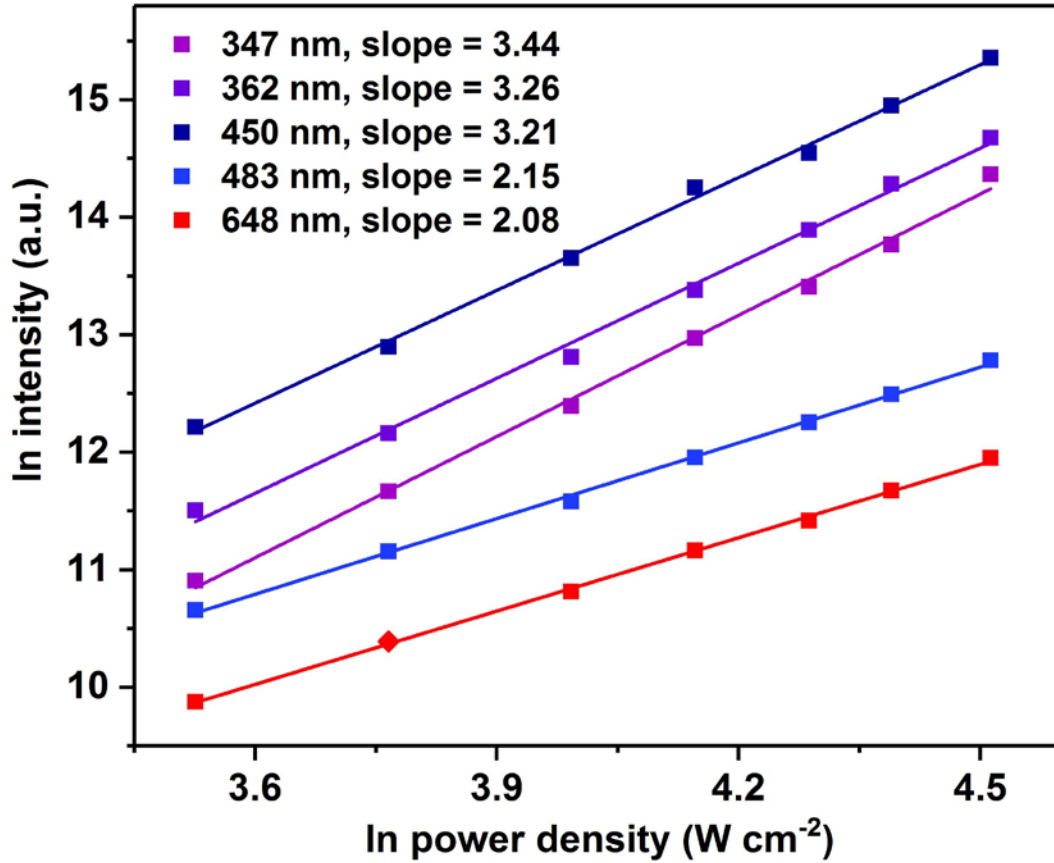

**Supplementary Figure 5.** Power density dependence of the  $\text{Tm}^{3+}$  emissions at 347 nm ( $^1\text{I}_6 \rightarrow ^3\text{F}_4$ ), 362 nm ( $^1\text{D}_2 \rightarrow ^3\text{H}_6$ ), 450 nm ( $^1\text{D}_2 \rightarrow ^3\text{F}_4$ ), 483 nm ( $^1\text{G}_4 \rightarrow ^3\text{H}_6$ ), and 648 nm ( $^1\text{G}_4 \rightarrow ^3\text{F}_4$ ) in  $\text{LiYbF}_4:0.5\%\text{Tm}^{3+}@\text{LiYF}_4$  core/shell NPs, indicating five-, four-, and three-photon upconversion processes for the emissions from  $^1\text{I}_6$ ,  $^1\text{D}_2$ , and  $^1\text{G}_4$  level of  $\text{Tm}^{3+}$ , respectively. The deviation from the theoretically predicted photon number for the population of  $^1\text{I}_6$  ( $n = 5$ ),  $^1\text{D}_2$  ( $n = 4$ ) and  $^1\text{G}_4$  ( $n = 3$ ) of  $\text{Tm}^{3+}$  is most probably due to the upconversion saturation caused by the middle-to-high pump power density regime we employed.

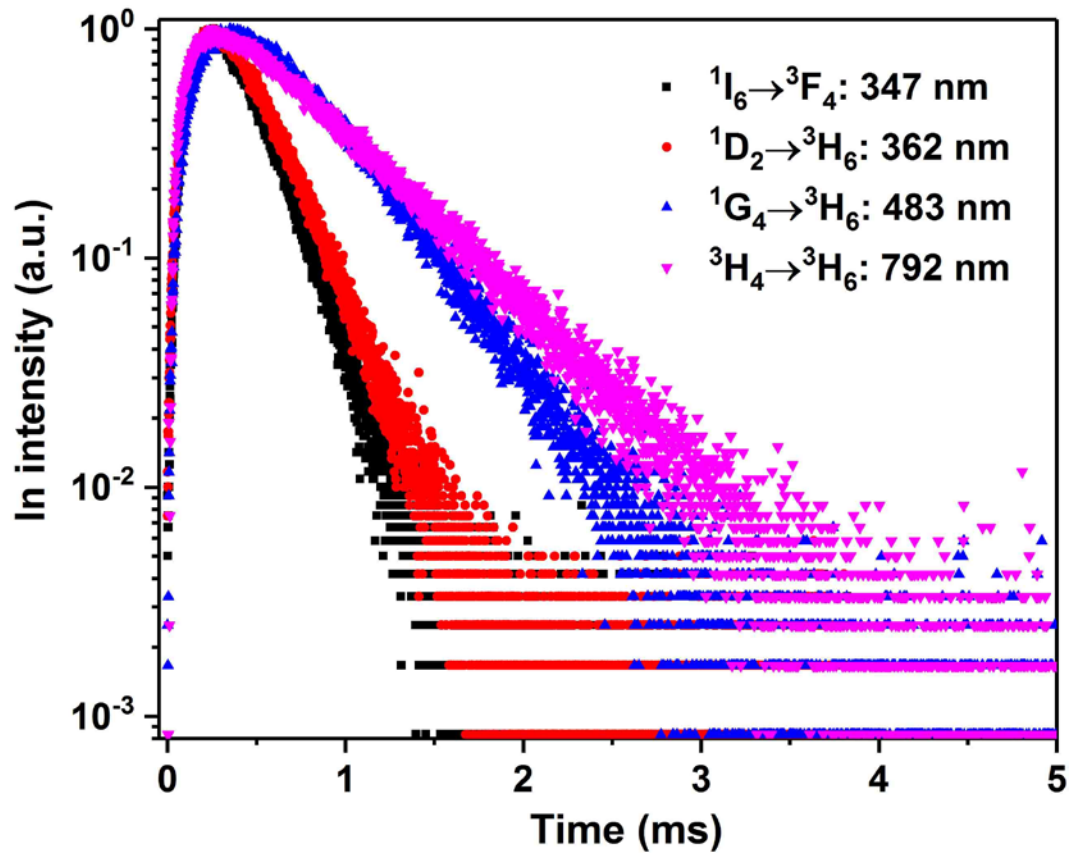

**Supplementary Figure 6.** UCL decays from  $^1I_6$ ,  $^1D_2$ ,  $^1G_4$ , and  $^3H_4$  of  $Tm^{3+}$  by monitoring the  $Tm^{3+}$  emissions at 347, 362, 483, and 792 nm, respectively, in  $LiYbF_4:0.5\%Tm^{3+}@LiYF_4$  core/shell NPs under 980 nm excitation. All UCL decays displayed a rising edge in the initial stage, as a result of the slow population process of the emitting energy levels of  $Tm^{3+}$  through energy transfer from  $Yb^{3+}$ . By single-exponential fitting to the decay curves, the UCL lifetimes of  $^1I_6$ ,  $^1D_2$ ,  $^1G_4$ , and  $^3H_4$  of  $Tm^{3+}$  were determined to be 217, 253, 447, and 601  $\mu s$ , respectively.



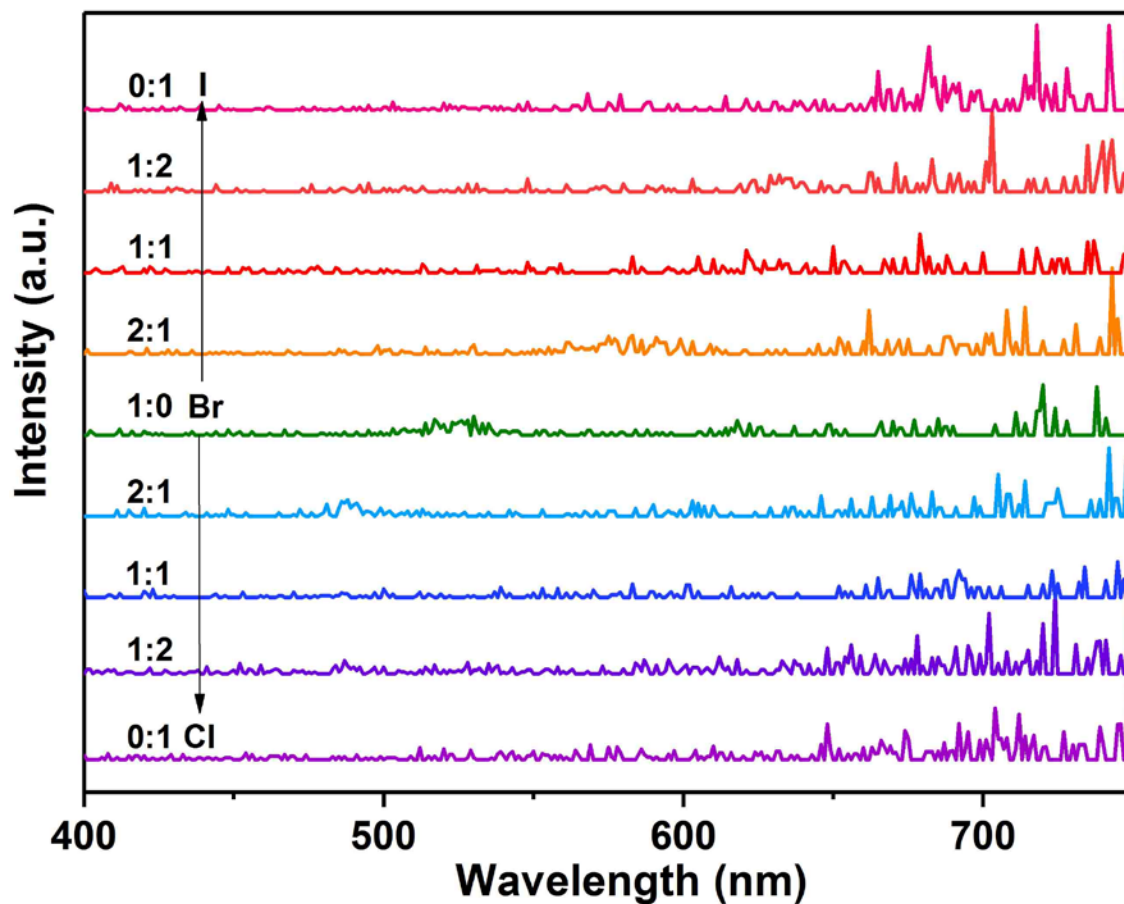

**Supplementary Figure 7.** UCL spectra of CsPbX<sub>3</sub> PeQDs with varying halide compositions under 980 nm excitation with a CW diode laser at a power density of 50 W cm<sup>-2</sup>, showing that CW laser cannot trigger photon upconversion in pure PeQDs.

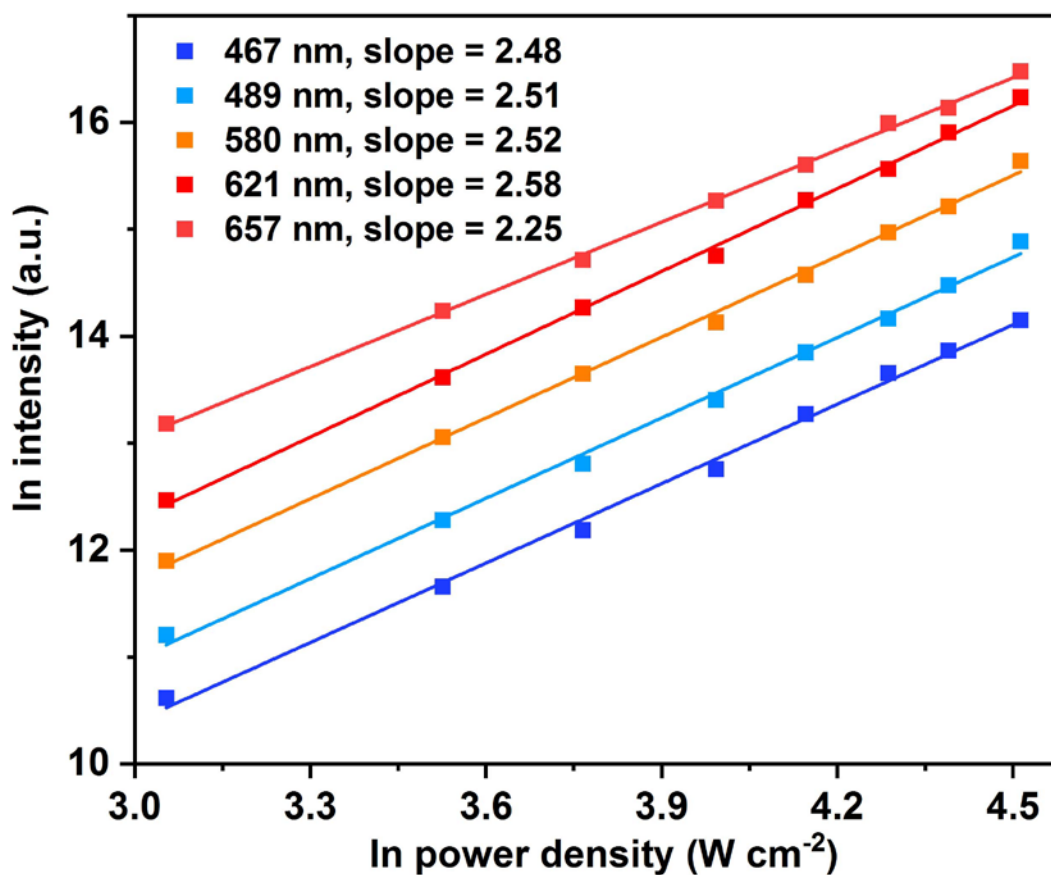

**Supplementary Figure 8.** Power density dependence of the upconverted exciton emissions from CsPbCl<sub>1.5</sub>Br<sub>1.5</sub> at 467 nm, CsPbCl<sub>1</sub>Br<sub>2</sub> at 489 nm, CsPbBr<sub>2</sub>I<sub>1</sub> at 580 nm, CsPbBr<sub>1.5</sub>I<sub>1.5</sub> at 621 nm, and CsPbBr<sub>1</sub>I<sub>2</sub> at 657 nm in NPs-sensitized PeQDs under 980 nm CW diode laser excitation, showing a three-photon upconversion process for all emissions.

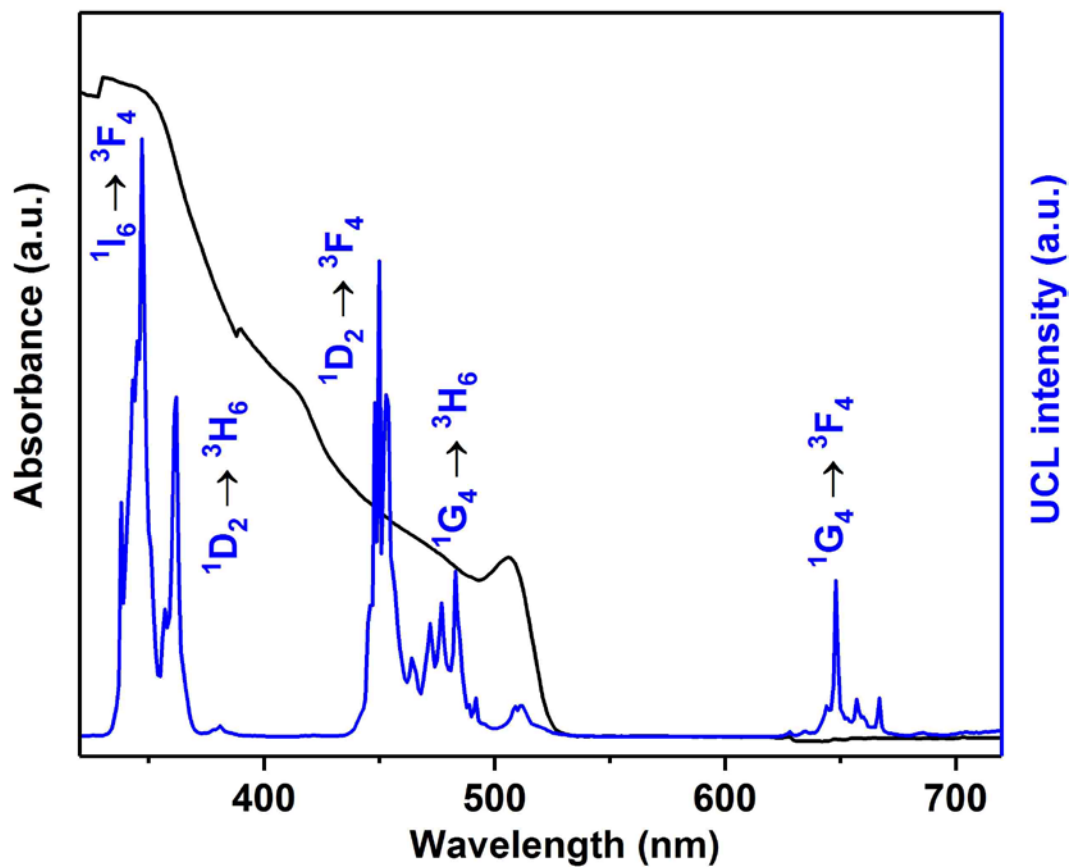

**Supplementary Figure 9.** Comparison of the absorption spectrum of CsPbBr<sub>3</sub> PeQDs (black) and the UCL spectrum of LiYbF<sub>4</sub>:0.5%Tm<sup>3+</sup>@LiYF<sub>4</sub> core/shell NPs (blue) under 980 nm CW diode laser excitation at a power density of 50 W cm<sup>-2</sup>.

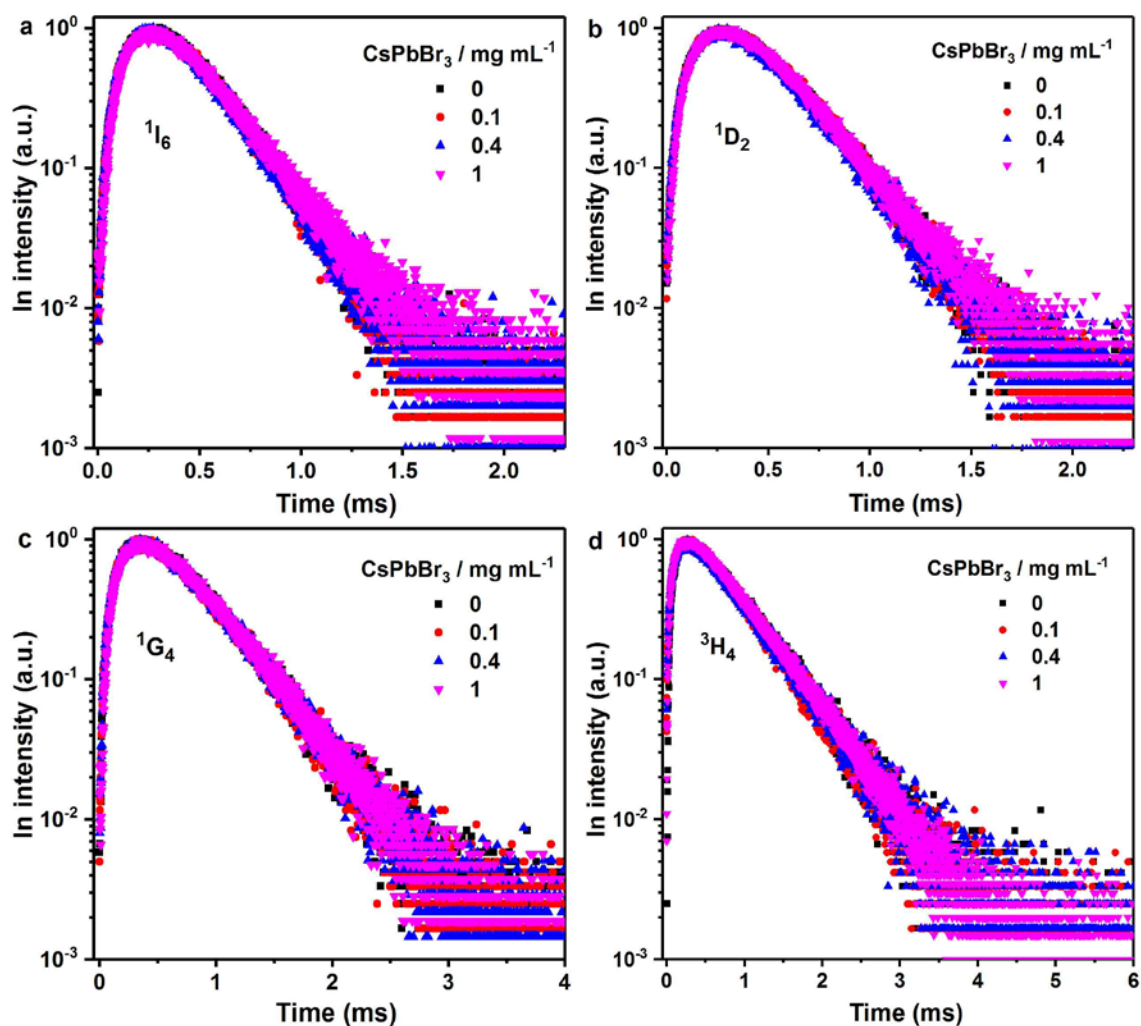

**Supplementary Figure 10.** CsPbBr<sub>3</sub> concentration-dependent UCL decays from **a** <sup>1</sup>I<sub>6</sub>, **b** <sup>1</sup>D<sub>2</sub>, **c** <sup>1</sup>G<sub>4</sub>, and **d** <sup>3</sup>H<sub>4</sub> of Tm<sup>3+</sup> by monitoring the Tm<sup>3+</sup> emissions at 347, 362, 483, and 792 nm, respectively, in NPs-sensitized CsPbBr<sub>3</sub> PeQDs with NPs concentration of 1 mg mL<sup>-1</sup> under 980 nm excitation. All UCL decays are nearly identical for each level of Tm<sup>3+</sup> and are independent of the concentration and absorption of CsPbBr<sub>3</sub> PeQDs, thus providing a solid evidence for the radiative energy transfer from the NPs to CsPbBr<sub>3</sub> PeQDs.

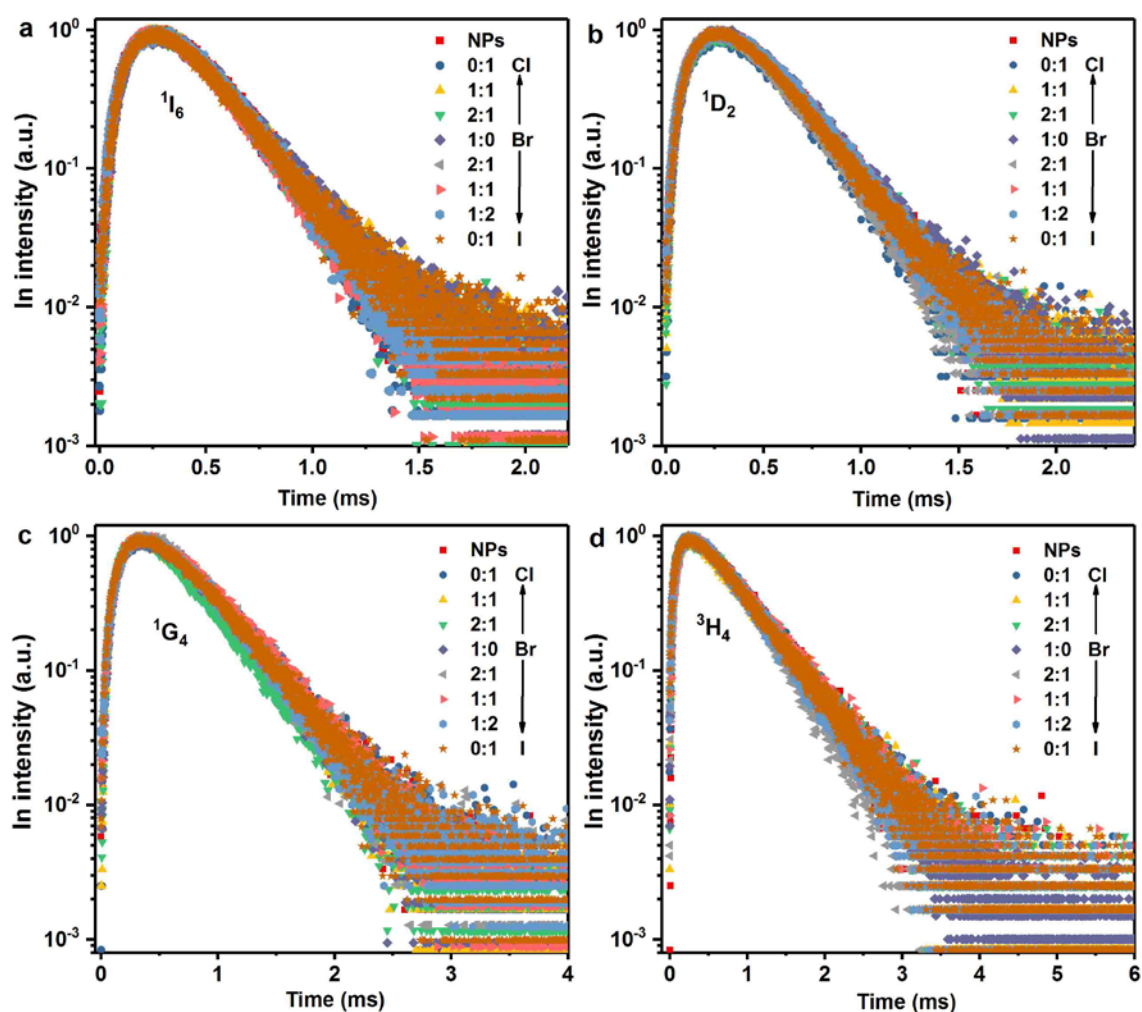

**Supplementary Figure 11.** UCL decays from **a**  $^1I_6$ , **b**  $^1D_2$ , **c**  $^1G_4$ , and **d**  $^3H_4$  of  $Tm^{3+}$  by monitoring the  $Tm^{3+}$  emissions at 347, 362, 483, and 792 nm, respectively, in pure  $LiYbF_4:0.5\%Tm^{3+}@LiYF_4$  core/shell NPs and NPs-sensitized  $CsPbX_3$  PeQDs with varying halide compositions under 980 nm excitation. The concentrations of the NPs and PeQDs are 1 and 0.2  $mg\ mL^{-1}$ , respectively. All UCL decays are nearly identical for each level of  $Tm^{3+}$  and are independent of the composition and absorption of PeQDs, thus providing a solid evidence for the radiative energy transfer from the NPs to PeQDs.

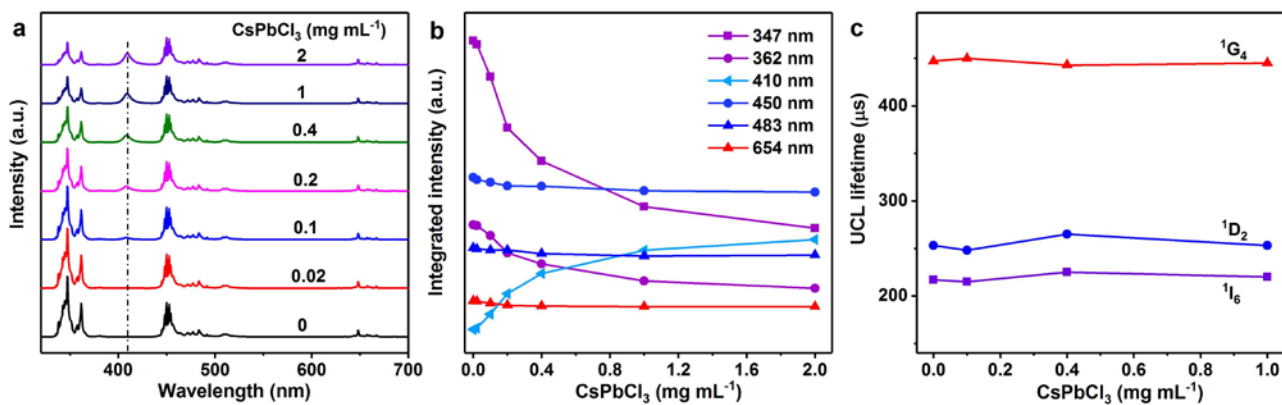

**Supplementary Figure 12.** **a** CsPbCl<sub>3</sub> concentration-dependent UCL spectra for NPs-sensitized CsPbCl<sub>3</sub> PeQDs with NPs concentration of 1 mg mL<sup>-1</sup> under 980 nm CW diode laser excitation at a power density of 50 W cm<sup>-2</sup>, showing a gradual increase in CsPbCl<sub>3</sub> emission at the expense of the UV emissions of Tm<sup>3+</sup>. **b** Integrated intensities of the Tm<sup>3+</sup> emissions at 347 nm (<sup>1</sup>I<sub>6</sub>→<sup>3</sup>F<sub>4</sub>), 362 nm (<sup>1</sup>D<sub>2</sub>→<sup>3</sup>H<sub>6</sub>), 450 nm (<sup>1</sup>D<sub>2</sub>→<sup>3</sup>F<sub>4</sub>), 483 nm (<sup>1</sup>G<sub>4</sub>→<sup>3</sup>H<sub>6</sub>) and 648 nm (<sup>1</sup>G<sub>4</sub>→<sup>3</sup>F<sub>4</sub>), and the CsPbCl<sub>3</sub> emission at 410 nm versus the CsPbCl<sub>3</sub> concentration, as obtained from (a). **c** UCL lifetimes of <sup>1</sup>I<sub>6</sub>, <sup>1</sup>D<sub>2</sub>, and <sup>1</sup>G<sub>4</sub> of Tm<sup>3+</sup> in NPs-sensitized CsPbCl<sub>3</sub> PeQDs versus the CsPbCl<sub>3</sub> concentration. The distinct UCL evolutions between the UV (362 nm) and blue (450 nm) emissions from <sup>1</sup>D<sub>2</sub> and the nearly unchanged UCL lifetimes of Tm<sup>3+</sup> with increasing the CsPbCl<sub>3</sub> concentration, demonstrate that the energy transfer from the NPs to CsPbCl<sub>3</sub> PeQDs is dictated by a radiative reabsorption process instead of a non-radiative FRET process.

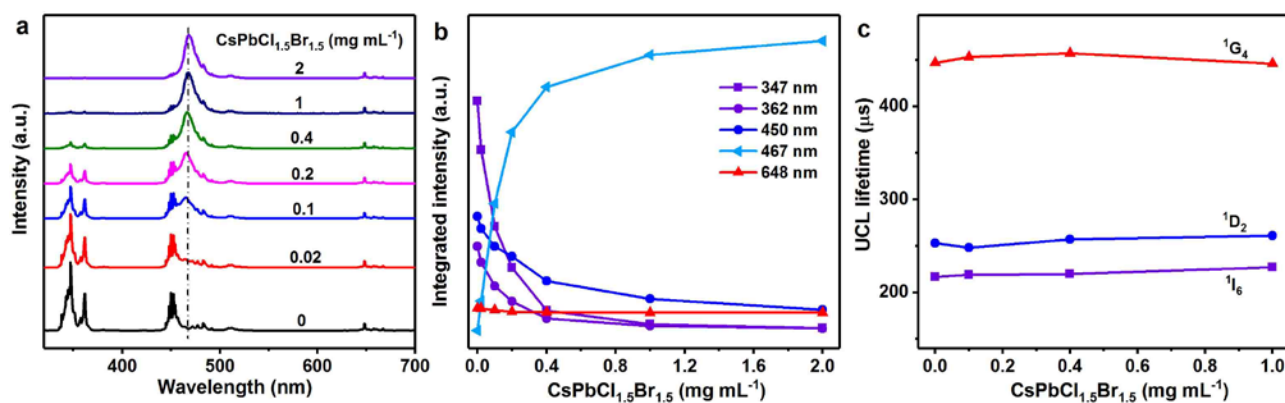

**Supplementary Figure 13.** **a** CsPbCl<sub>1.5</sub>Br<sub>1.5</sub> concentration-dependent UCL spectra for NPs-sensitized CsPbCl<sub>1.5</sub>Br<sub>1.5</sub> PeQDs with NPs concentration of 1 mg mL<sup>-1</sup> under 980 nm CW diode laser excitation at a power density of 50 W cm<sup>-2</sup>, showing a gradual increased CsPbCl<sub>1.5</sub>Br<sub>1.5</sub> emission at the expense of the UV and blue emissions of Tm<sup>3+</sup>. **b** Integrated intensities of the Tm<sup>3+</sup> emissions at 347 nm (<sup>1</sup>I<sub>6</sub>→<sup>3</sup>F<sub>4</sub>), 362 nm (<sup>1</sup>D<sub>2</sub>→<sup>3</sup>H<sub>6</sub>), 450 nm (<sup>1</sup>D<sub>2</sub>→<sup>3</sup>F<sub>4</sub>) and 648 nm (<sup>1</sup>G<sub>4</sub>→<sup>3</sup>F<sub>4</sub>), and the CsPbCl<sub>1.5</sub>Br<sub>1.5</sub> emission at 467 nm versus the CsPbCl<sub>1.5</sub>Br<sub>1.5</sub> concentration, as obtained from (a). **c** UCL lifetimes of <sup>1</sup>I<sub>6</sub>, <sup>1</sup>D<sub>2</sub>, and <sup>1</sup>G<sub>4</sub> of Tm<sup>3+</sup> in NPs-sensitized CsPbCl<sub>1.5</sub>Br<sub>1.5</sub> PeQDs versus the CsPbCl<sub>1.5</sub>Br<sub>1.5</sub> concentration. The distinct UCL evolutions between the UV (362 nm) and blue (450 nm) emissions from <sup>1</sup>D<sub>2</sub> and the nearly unchanged UCL lifetimes of Tm<sup>3+</sup> with increasing the CsPbCl<sub>1.5</sub>Br<sub>1.5</sub> concentration, demonstrate that the energy transfer from the NPs to CsPbCl<sub>1.5</sub>Br<sub>1.5</sub> PeQDs is a radiative energy transfer process instead of a non-radiative FRET process.

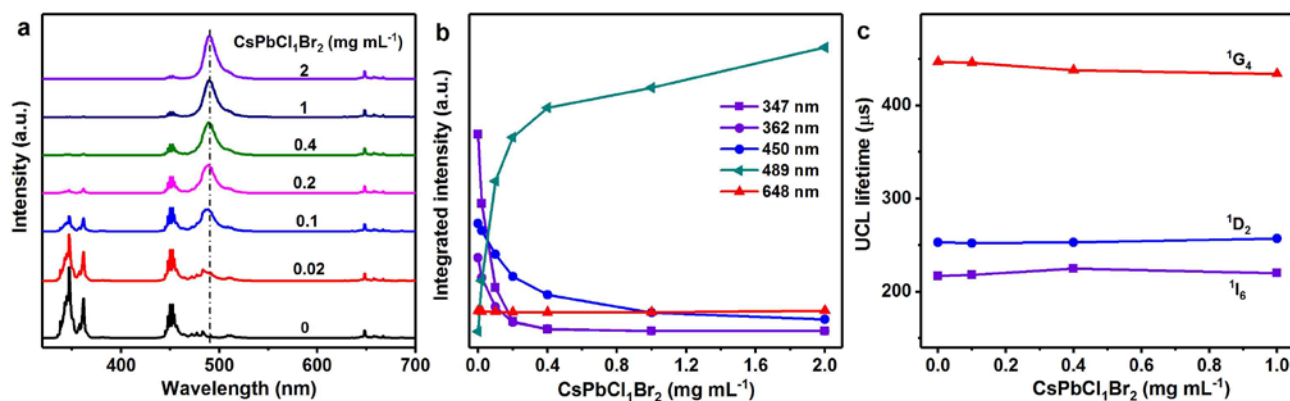

**Supplementary Figure 14.** **a** CsPbCl<sub>1</sub>Br<sub>2</sub> concentration-dependent UCL spectra for NPs-sensitized CsPbCl<sub>1</sub>Br<sub>2</sub> PeQDs with NPs concentration of 1 mg mL<sup>-1</sup> under 980 nm CW diode laser excitation at a power density of 50 W cm<sup>-2</sup>, showing a gradual increase in CsPbCl<sub>1</sub>Br<sub>2</sub> emission at the expense of the UV and blue emissions of Tm<sup>3+</sup>. **b** Integrated intensities of the Tm<sup>3+</sup> emissions at 347 nm (<sup>1</sup>I<sub>6</sub>→<sup>3</sup>F<sub>4</sub>), 362 nm (<sup>1</sup>D<sub>2</sub>→<sup>3</sup>H<sub>6</sub>), 450 nm (<sup>1</sup>D<sub>2</sub>→<sup>3</sup>F<sub>4</sub>) and 648 nm (<sup>1</sup>G<sub>4</sub>→<sup>3</sup>F<sub>4</sub>), and the CsPbCl<sub>1</sub>Br<sub>2</sub> emission at 489 nm versus the CsPbCl<sub>1</sub>Br<sub>2</sub> concentration, as obtained from (a). **c** UCL lifetimes of <sup>1</sup>I<sub>6</sub>, <sup>1</sup>D<sub>2</sub>, and <sup>1</sup>G<sub>4</sub> of Tm<sup>3+</sup> in NPs-sensitized CsPbCl<sub>1</sub>Br<sub>2</sub> PeQDs versus the CsPbCl<sub>1</sub>Br<sub>2</sub> concentration. The distinct UCL evolutions between the UV (362 nm) and blue (450 nm) emissions from <sup>1</sup>D<sub>2</sub> and the nearly unchanged UCL lifetimes of Tm<sup>3+</sup> with increasing the CsPbCl<sub>1</sub>Br<sub>2</sub> concentration, reveal that the energy transfer from the NPs to CsPbCl<sub>1</sub>Br<sub>2</sub> PeQDs is mediated by a radiative reabsorption process rather than a non-radiative FRET process.



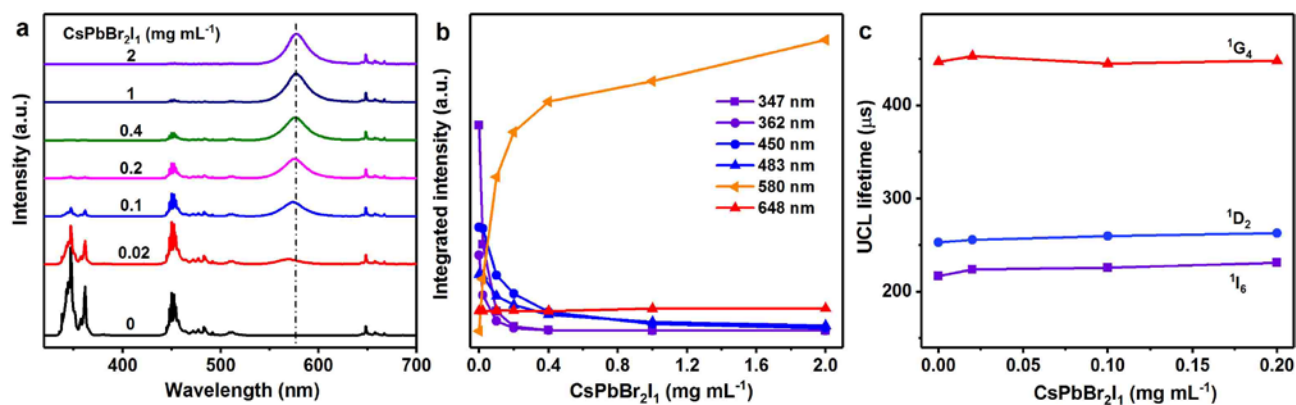

**Supplementary Figure 15.** **a** CsPbBr<sub>2</sub>I<sub>1</sub> concentration-dependent UCL spectra for NPs-sensitized CsPbBr<sub>2</sub>I<sub>1</sub> PeQDs with NPs concentration of 1 mg mL<sup>-1</sup> under 980 nm CW diode laser excitation at a power density of 50 W cm<sup>-2</sup>, showing a stepwise increased CsPbBr<sub>2</sub>I<sub>1</sub> emission at the expense of the UV and blue emissions of Tm<sup>3+</sup>. **b** Integrated intensities of the Tm<sup>3+</sup> emissions at 347 nm (<sup>1</sup>I<sub>6</sub>→<sup>3</sup>F<sub>4</sub>), 362 nm (<sup>1</sup>D<sub>2</sub>→<sup>3</sup>H<sub>6</sub>), 450 nm (<sup>1</sup>D<sub>2</sub>→<sup>3</sup>F<sub>4</sub>), 483 nm (<sup>1</sup>G<sub>4</sub>→<sup>3</sup>H<sub>6</sub>) and 648 nm (<sup>1</sup>G<sub>4</sub>→<sup>3</sup>F<sub>4</sub>), and the CsPbBr<sub>2</sub>I<sub>1</sub> emission at 580 nm versus the CsPbBr<sub>2</sub>I<sub>1</sub> concentration, as obtained from (a). **c** UCL lifetimes of <sup>1</sup>I<sub>6</sub>, <sup>1</sup>D<sub>2</sub>, and <sup>1</sup>G<sub>4</sub> of Tm<sup>3+</sup> in NPs-sensitized CsPbBr<sub>2</sub>I<sub>1</sub> PeQDs versus the CsPbBr<sub>2</sub>I<sub>1</sub> concentration. The distinct UCL evolutions between the UV (362 nm) and blue (450 nm) emissions from <sup>1</sup>D<sub>2</sub> and between the blue (483 nm) and red (648 nm) emissions from <sup>1</sup>G<sub>4</sub>, and the nearly unchanged UCL lifetimes of Tm<sup>3+</sup> with increasing the CsPbBr<sub>2</sub>I<sub>1</sub> concentration, demonstrate that the energy transfer from the NPs to CsPbBr<sub>2</sub>I<sub>1</sub> PeQDs is a radiative energy transfer process instead of a non-radiative FRET process.

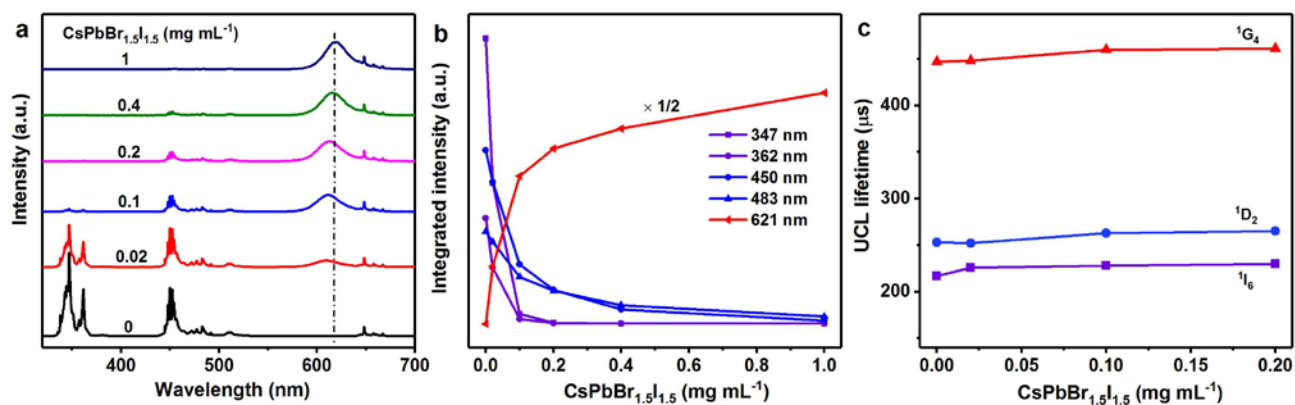

**Supplementary Figure 16.** **a** CsPbBr<sub>1.5</sub>I<sub>1.5</sub> concentration-dependent UCL spectra for NPs-sensitized CsPbBr<sub>1.5</sub>I<sub>1.5</sub> PeQDs with NPs concentration of 1 mg mL<sup>-1</sup> under 980 nm CW diode laser excitation at a power density of 50 W cm<sup>-2</sup>, showing a gradual increase in CsPbBr<sub>1.5</sub>I<sub>1.5</sub> emission at the expense of the UV and blue emissions of Tm<sup>3+</sup>. **b** Integrated intensities of the Tm<sup>3+</sup> emissions at 347 nm (<sup>1</sup>I<sub>6</sub>→<sup>3</sup>F<sub>4</sub>), 362 nm (<sup>1</sup>D<sub>2</sub>→<sup>3</sup>H<sub>6</sub>), 450 nm (<sup>1</sup>D<sub>2</sub>→<sup>3</sup>F<sub>4</sub>) and 483 nm (<sup>1</sup>G<sub>4</sub>→<sup>3</sup>H<sub>6</sub>), and the CsPbBr<sub>1.5</sub>I<sub>1.5</sub> emission at 621 nm versus the CsPbBr<sub>1.5</sub>I<sub>1.5</sub> concentration, as obtained from (a). **c** UCL lifetimes of <sup>1</sup>I<sub>6</sub>, <sup>1</sup>D<sub>2</sub>, and <sup>1</sup>G<sub>4</sub> of Tm<sup>3+</sup> in NPs-sensitized CsPbBr<sub>1.5</sub>I<sub>1.5</sub> PeQDs versus the CsPbBr<sub>1.5</sub>I<sub>1.5</sub> concentration. The distinct UCL evolutions between the UV (362 nm) and blue (450 nm) emissions from <sup>1</sup>D<sub>2</sub> and between the blue (483 nm) and red (648 nm) emissions from <sup>1</sup>G<sub>4</sub>, and the nearly unchanged UCL lifetimes of Tm<sup>3+</sup> with increasing the CsPbBr<sub>1.5</sub>I<sub>1.5</sub> concentration, demonstrate that the energy transfer from the NPs to CsPbBr<sub>1.5</sub>I<sub>1.5</sub> PeQDs is governed by a radiative reabsorption process instead of a non-radiative FRET process.

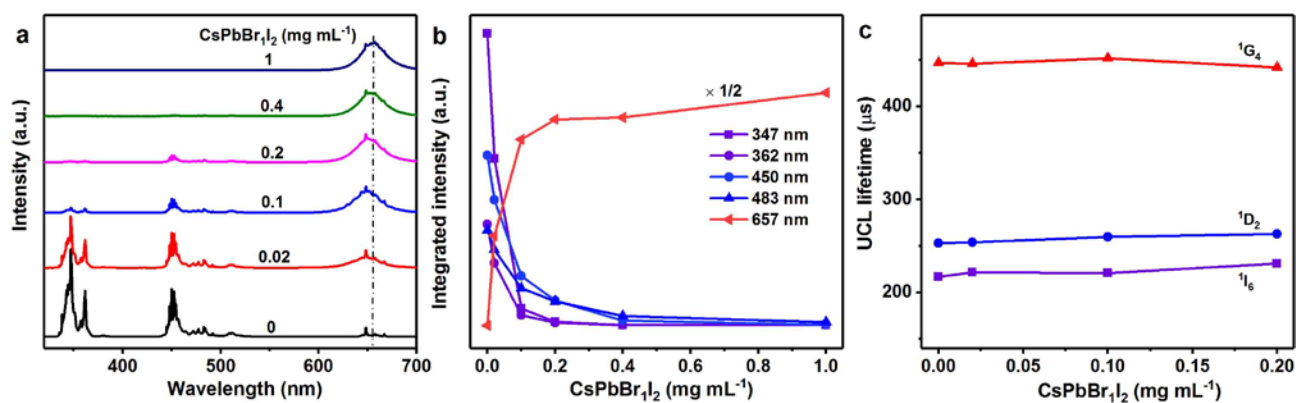

**Supplementary Figure 17.** **a** CsPbBr<sub>1.2</sub> concentration-dependent UCL spectra for NPs-sensitized CsPbBr<sub>1.2</sub> PeQDs with NPs concentration of 1 mg mL<sup>-1</sup> under 980 nm CW diode laser excitation at a power density of 50 W cm<sup>-2</sup>, showing a stepwise increased CsPbBr<sub>1.2</sub> emission at the expense of the UV, blue, and red emissions of Tm<sup>3+</sup>. **b** Integrated intensities of the Tm<sup>3+</sup> emissions at 347 nm (<sup>1</sup>I<sub>6</sub>→<sup>3</sup>F<sub>4</sub>), 362 nm (<sup>1</sup>D<sub>2</sub>→<sup>3</sup>H<sub>6</sub>), 450 nm (<sup>1</sup>D<sub>2</sub>→<sup>3</sup>F<sub>4</sub>) and 483 nm (<sup>1</sup>G<sub>4</sub>→<sup>3</sup>H<sub>6</sub>), and the CsPbBr<sub>1.2</sub> emission at 657 nm versus the CsPbBr<sub>1.2</sub> concentration, as obtained from (a). **c** UCL lifetimes of <sup>1</sup>I<sub>6</sub>, <sup>1</sup>D<sub>2</sub>, and <sup>1</sup>G<sub>4</sub> of Tm<sup>3+</sup> in NPs-sensitized CsPbBr<sub>1.2</sub> PeQDs versus the CsPbBr<sub>1.2</sub> concentration. The distinct UCL evolutions between the UV (362 nm) and blue (450 nm) emissions from <sup>1</sup>D<sub>2</sub> and between the blue (483 nm) and red (648 nm) emissions from <sup>1</sup>G<sub>4</sub>, and the nearly unchanged UCL lifetimes of Tm<sup>3+</sup> with increasing the CsPbBr<sub>1.2</sub> concentration, demonstrate that the energy transfer from the NPs to CsPbBr<sub>1.2</sub> PeQDs is a radiative energy transfer process instead of a non-radiative FRET process.

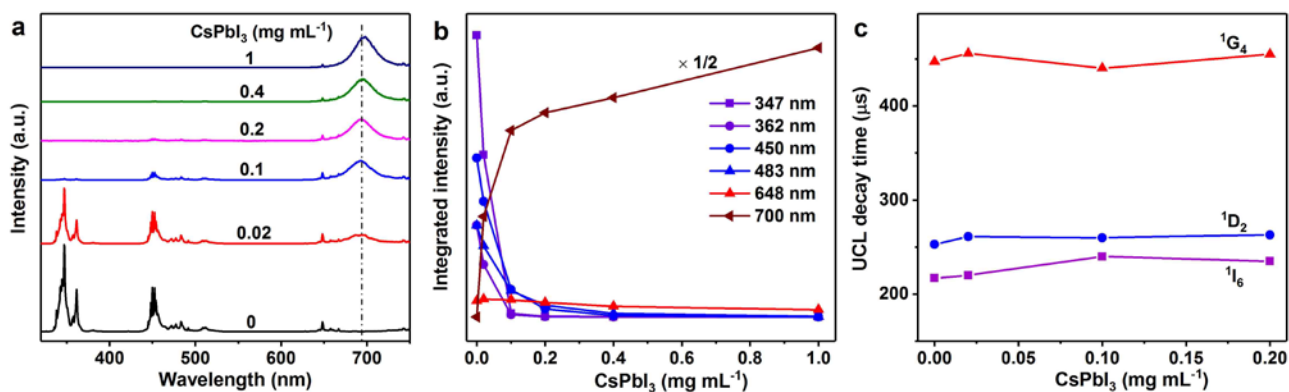

**Supplementary Figure 18.** **a** CsPbI<sub>3</sub> concentration-dependent UCL spectra for NPs-sensitized CsPbI<sub>3</sub> PeQDs with NPs concentration of 1 mg mL<sup>-1</sup> under 980 nm CW diode laser excitation at a power density of 50 W cm<sup>-2</sup>, showing a gradual increase in CsPbI<sub>3</sub> emission at the expense of the UV, blue, and red emissions of Tm<sup>3+</sup>. **b** Integrated intensities of the Tm<sup>3+</sup> emissions at 347 nm (<sup>1</sup>I<sub>6</sub>→<sup>3</sup>F<sub>4</sub>), 362 nm (<sup>1</sup>D<sub>2</sub>→<sup>3</sup>H<sub>6</sub>), 450 nm (<sup>1</sup>D<sub>2</sub>→<sup>3</sup>F<sub>4</sub>), 483 nm (<sup>1</sup>G<sub>4</sub>→<sup>3</sup>H<sub>6</sub>) and 648 nm (<sup>1</sup>G<sub>4</sub>→<sup>3</sup>F<sub>4</sub>), and the CsPbI<sub>3</sub> emission at 700 nm versus the CsPbI<sub>3</sub> concentration, as obtained from (a). **c** UCL lifetimes of <sup>1</sup>I<sub>6</sub>, <sup>1</sup>D<sub>2</sub>, and <sup>1</sup>G<sub>4</sub> of Tm<sup>3+</sup> in NPs-sensitized CsPbI<sub>3</sub> PeQDs versus the CsPbI<sub>3</sub> concentration. The distinct UCL evolutions between the UV (362 nm) and blue (450 nm) emissions from <sup>1</sup>D<sub>2</sub> and between the blue (483 nm) and red (648 nm) emissions from <sup>1</sup>G<sub>4</sub>, and the nearly unchanged UCL lifetimes of Tm<sup>3+</sup> with increasing CsPbI<sub>3</sub> concentration, demonstrate that the energy transfer from the NPs to CsPbI<sub>3</sub> PeQDs is radiative energy transfer rather than non-radiative FRET.

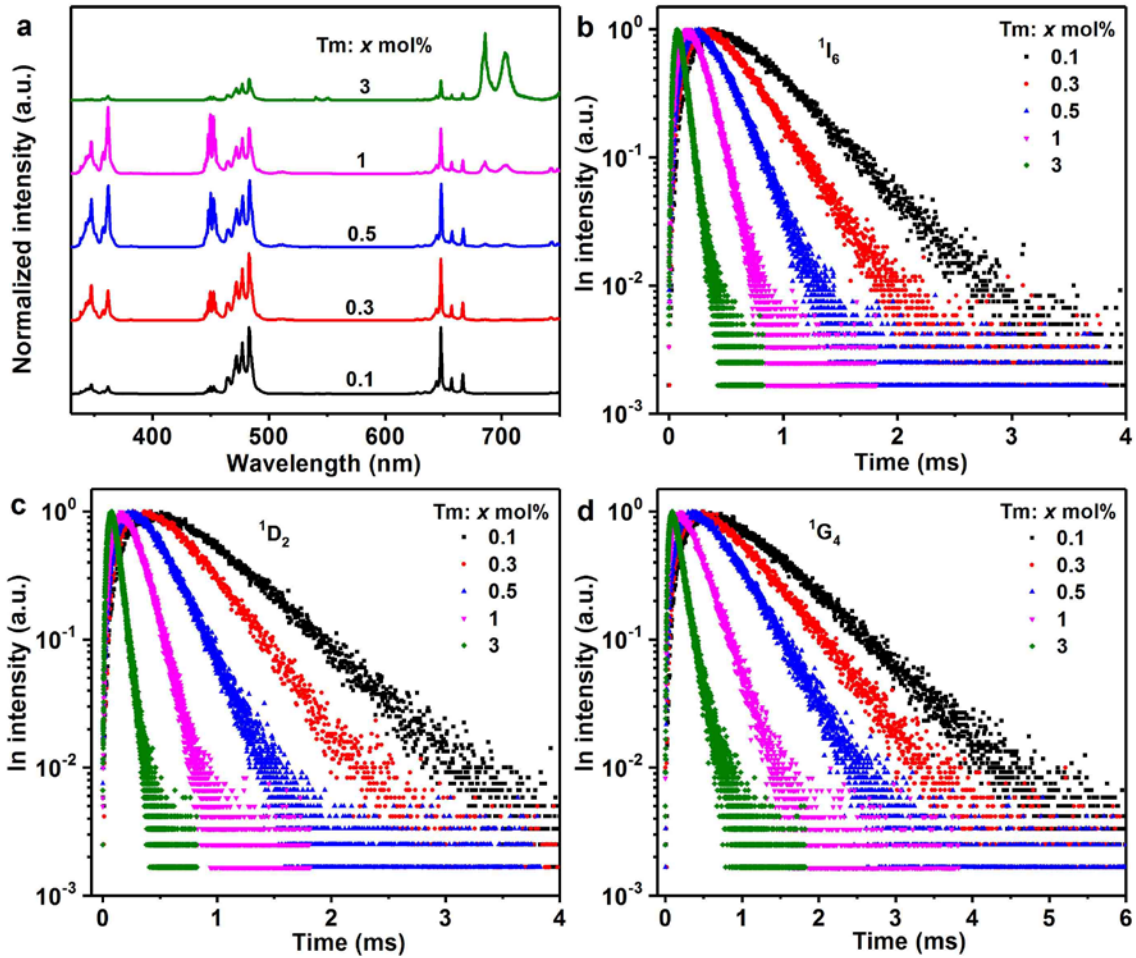

**Supplementary Figure 19.** **a** UCL spectra for  $\text{LiYbF}_4:x\% \text{Tm}^{3+} @ \text{LiYF}_4$  core/shell NPs with varying  $\text{Tm}^{3+}$  concentration under 980 nm CW diode laser excitation at a power density of  $50 \text{ W cm}^{-2}$ . The corresponding UCL decays from **b**  $^1\text{I}_6$ , **c**  $^1\text{D}_2$ , and **d**  $^1\text{G}_4$  of  $\text{Tm}^{3+}$  by monitoring the  $\text{Tm}^{3+}$  emissions at 347, 362, and 483 nm, respectively. It was observed that the UV and blue emissions of  $\text{Tm}^{3+}$  decreased drastically when the  $\text{Tm}^{3+}$  concentration increased to 3 mol%, while the emission peaks at 685 and 703 nm which can be assigned to  $^3\text{F}_{2,3} \rightarrow ^3\text{H}_6$  transitions of  $\text{Tm}^{3+}$  intensified gradually with increasing the  $\text{Tm}^{3+}$  concentration. This can be ascribed to a synergic effect of the aggravated cross relaxation among  $\text{Tm}^{3+}$  ions and the increased energy back transfer from  $\text{Yb}^{3+}$  to  $\text{Tm}^{3+}$  arising from the decreased distance between  $\text{Tm}^{3+}$  and  $\text{Yb}^{3+}$  ions at higher  $\text{Tm}^{3+}$  concentrations, as also evidenced by the decreased UCL lifetimes of  $\text{Tm}^{3+}$  with increasing the  $\text{Tm}^{3+}$  concentration. By single-exponential fitting to the decay curves, the UCL lifetimes of  $^1\text{I}_6$ ,  $^1\text{D}_2$ , and  $^1\text{G}_4$  of  $\text{Tm}^{3+}$  were determined to decrease from 473, 553, and 803  $\mu\text{s}$  (0.1 mol%) to 60, 61, and 119  $\mu\text{s}$  (3 mol%), respectively.

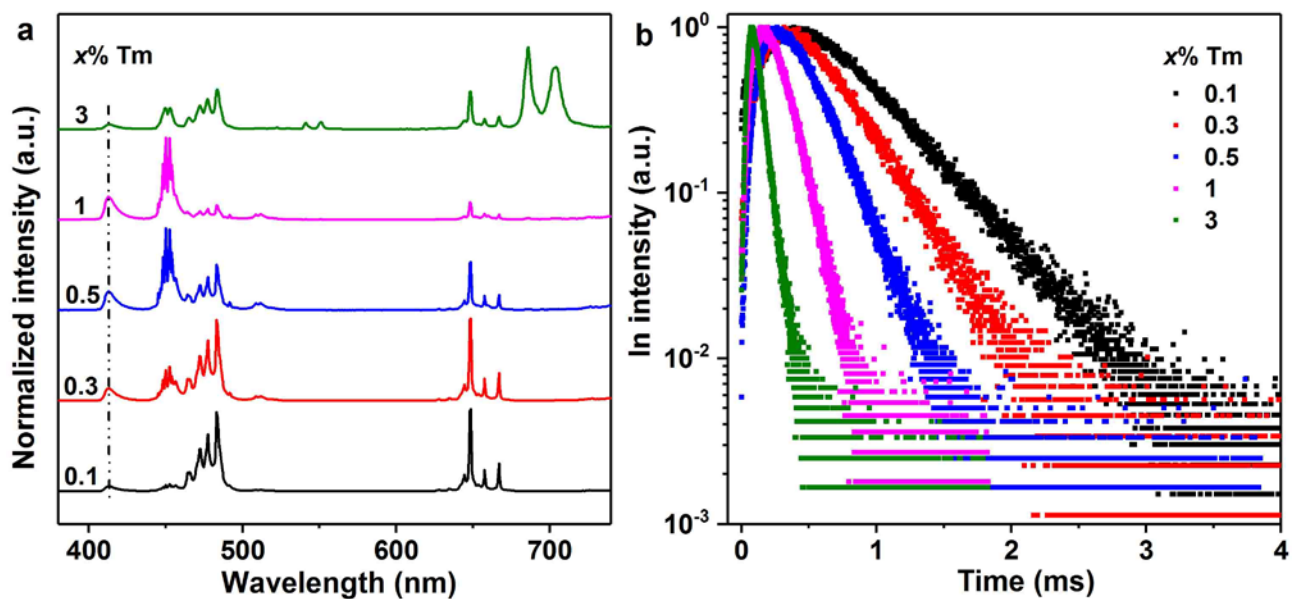

**Supplementary Figure 20.** **a** UCL spectra for NPs-sensitized CsPbCl<sub>3</sub> PeQDs with varying Tm<sup>3+</sup> concentration in the NPs under 980 nm CW diode laser excitation at a power density of 50 W cm<sup>-2</sup>. **b** The corresponding UCL decays from band-edge excitons of CsPbCl<sub>3</sub> by monitoring their emission at 410 nm under 980 nm excitation, showing tunable lifetimes from 494 μs to 61 μs as the Tm<sup>3+</sup> concentration increased from 0.1 mol% to 3 mol%. The rising edge in the initial stage of the decay curves reflects the slow population of the PeQDs excited state from the long-lived Tm<sup>3+</sup> excited state, as a result of radiative energy transfer from the NPs to CsPbCl<sub>3</sub> PeQDs.

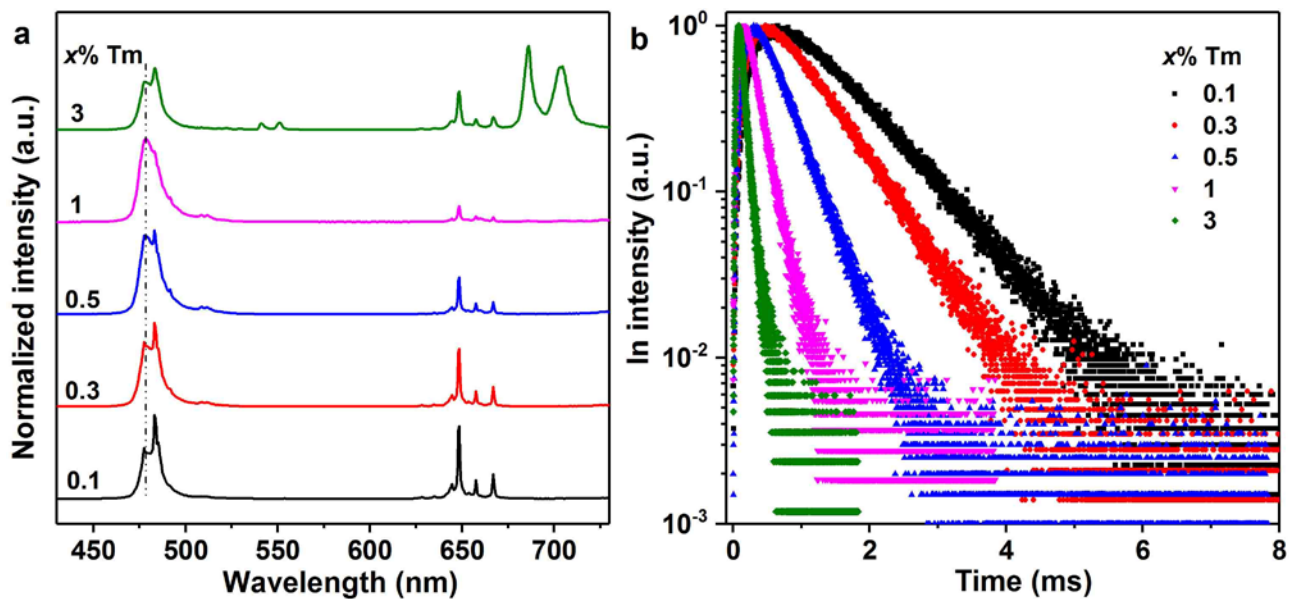

**Supplementary Figure 21.** **a** UCL spectra for NPs-sensitized CsPbCl<sub>1.5</sub>Br<sub>1.5</sub> PeQDs with varying Tm<sup>3+</sup> concentration in the NPs under 980 nm CW diode laser excitation at a power density of 50 W cm<sup>-2</sup>. **b** The corresponding UCL decays from band-edge excitons of CsPbCl<sub>1.5</sub>Br<sub>1.5</sub> by monitoring their emission at 467 nm under 980 nm excitation, showing tunable lifetimes from 978  $\mu$ s to 79  $\mu$ s as the Tm<sup>3+</sup> concentration increased from 0.1 mol% to 3 mol%. The rising edge in the initial stage of the decay curves reflects the slow population of the PeQDs excited state from the long-lived Tm<sup>3+</sup> excited state, as a result of radiative energy transfer from the NPs to CsPbCl<sub>1.5</sub>Br<sub>1.5</sub> PeQDs.

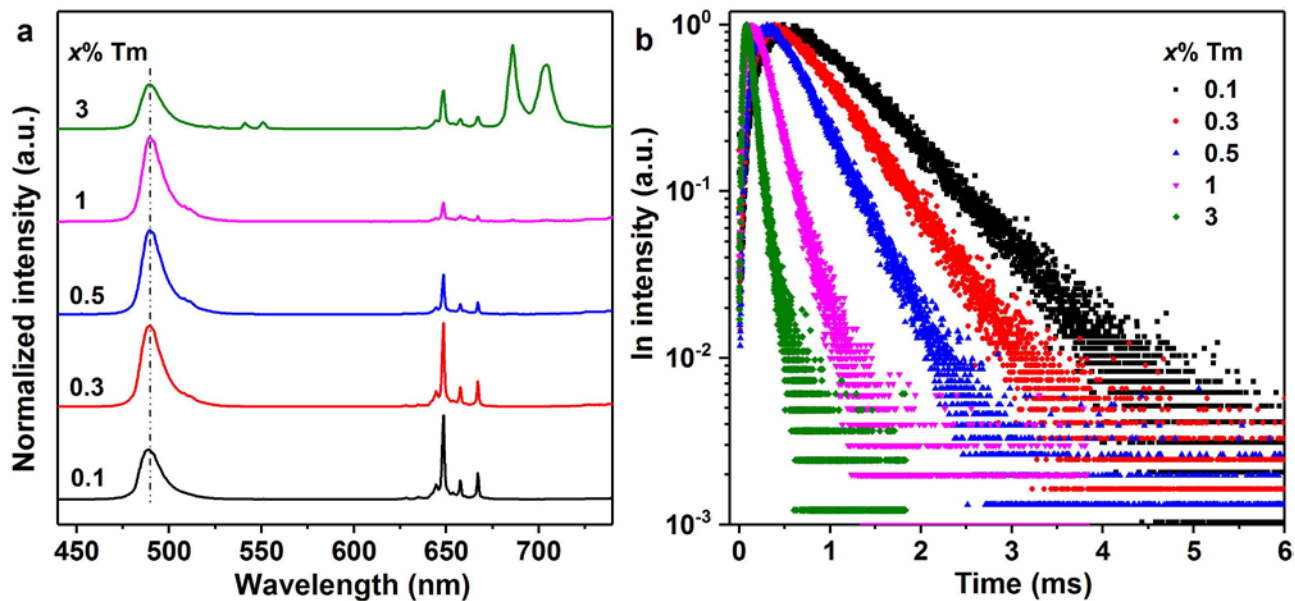

**Supplementary Figure 22.** **a** UCL spectra for NPs-sensitized CsPbCl<sub>1</sub>Br<sub>2</sub> PeQDs with varying Tm<sup>3+</sup> concentration in the NPs under 980 nm CW diode laser excitation at a power density of 50 W cm<sup>-2</sup>. **b** The corresponding UCL decays from band-edge excitons of CsPbCl<sub>1</sub>Br<sub>2</sub> by monitoring their emission at 489 nm under 980 nm excitation, showing tunable lifetimes from 775 μs to 81 μs as the Tm<sup>3+</sup> concentration increased from 0.1 mol% to 3 mol%. The rising edge in the initial stage of the decay curves reflects the slow population of the PeQDs excited state from the long-lived Tm<sup>3+</sup> excited state, as a result of radiative energy transfer from the NPs to CsPbCl<sub>1</sub>Br<sub>2</sub> PeQDs.



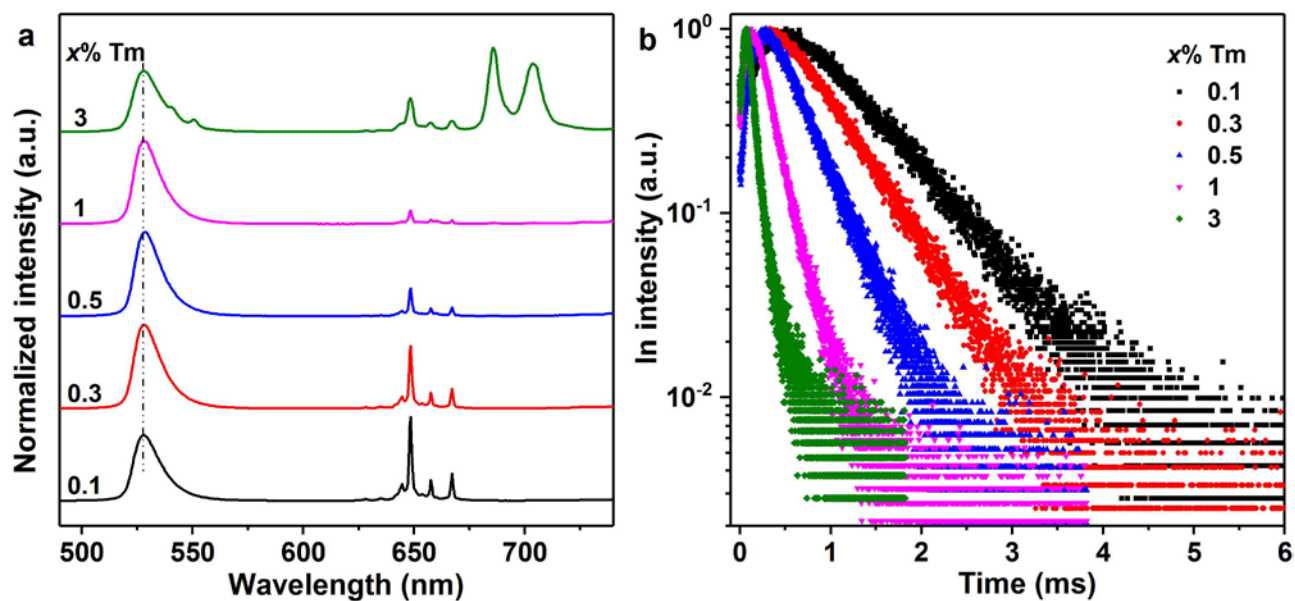

**Supplementary Figure 23.** **a** UCL spectra for NPs-sensitized CsPbBr<sub>3</sub> PeQDs with varying Tm<sup>3+</sup> concentration in the NPs under 980 nm CW diode laser excitation at a power density of 50 W cm<sup>-2</sup>. **b** The corresponding UCL decays from band-edge excitons of CsPbBr<sub>3</sub> by monitoring their emission at 520 nm under 980 nm excitation, showing tunable lifetimes from 794 μs to 81 μs as the Tm<sup>3+</sup> concentration increased from 0.1 mol% to 3 mol%. The rising edge in the initial stage of the decay curves reflects the slow population of the PeQDs excited state from the long-lived Tm<sup>3+</sup> excited state, as a result of radiative energy transfer from the NPs to CsPbBr<sub>3</sub> PeQDs.

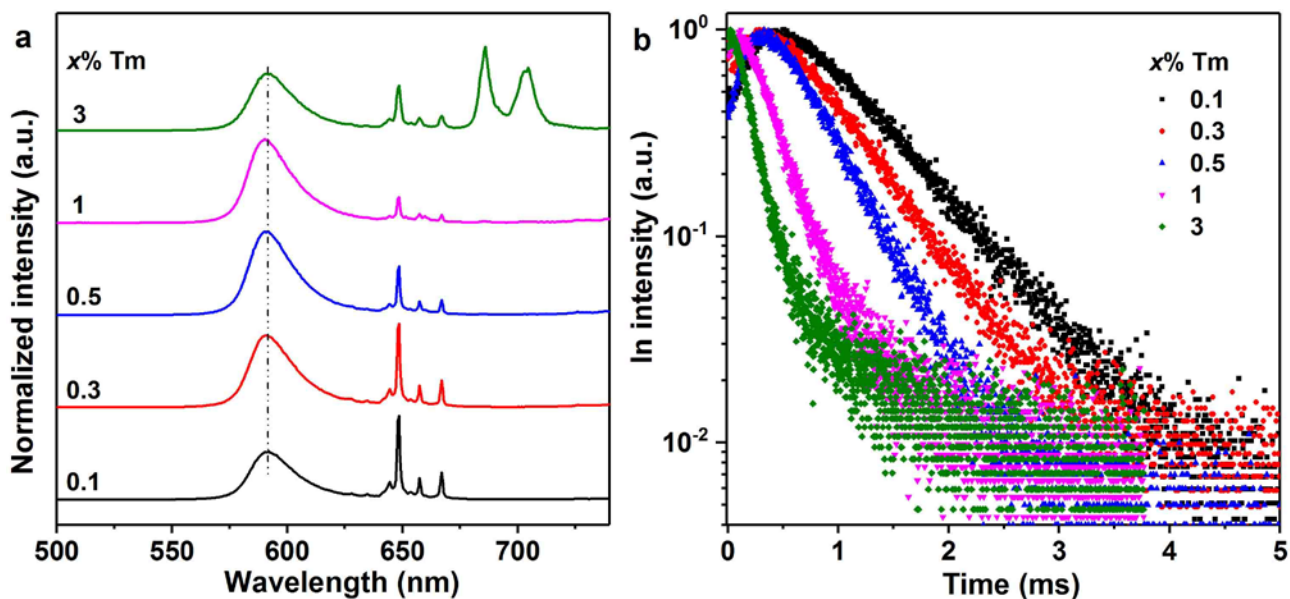

**Supplementary Figure 24.** **a** UCL spectra for NPs-sensitized CsPbBr<sub>2</sub>I<sub>1</sub> PeQDs with varying Tm<sup>3+</sup> concentration in the NPs under 980 nm CW diode laser excitation at a power density of 50 W cm<sup>-2</sup>. **b** The corresponding UCL decays from band-edge excitons of CsPbBr<sub>2</sub>I<sub>1</sub> by monitoring their emission at 580 nm under 980 nm excitation, showing tunable lifetimes from 742 μs to 198 μs as the Tm<sup>3+</sup> concentration increased from 0.1 mol% to 3 mol%. The rising edge in the initial stage of the decay curves reflects the slow population of the PeQDs excited state from the long-lived Tm<sup>3+</sup> excited state, as a result of radiative energy transfer from the NPs to CsPbBr<sub>2</sub>I<sub>1</sub> PeQDs. Note that the UCL signal in the beginning of the decay curves arising from two-photon absorption of CsPbBr<sub>2</sub>I<sub>1</sub> under 980 nm nanosecond-pulsed laser excitation had been deleted to guarantee the purity of the UCL signal from energy transfer.

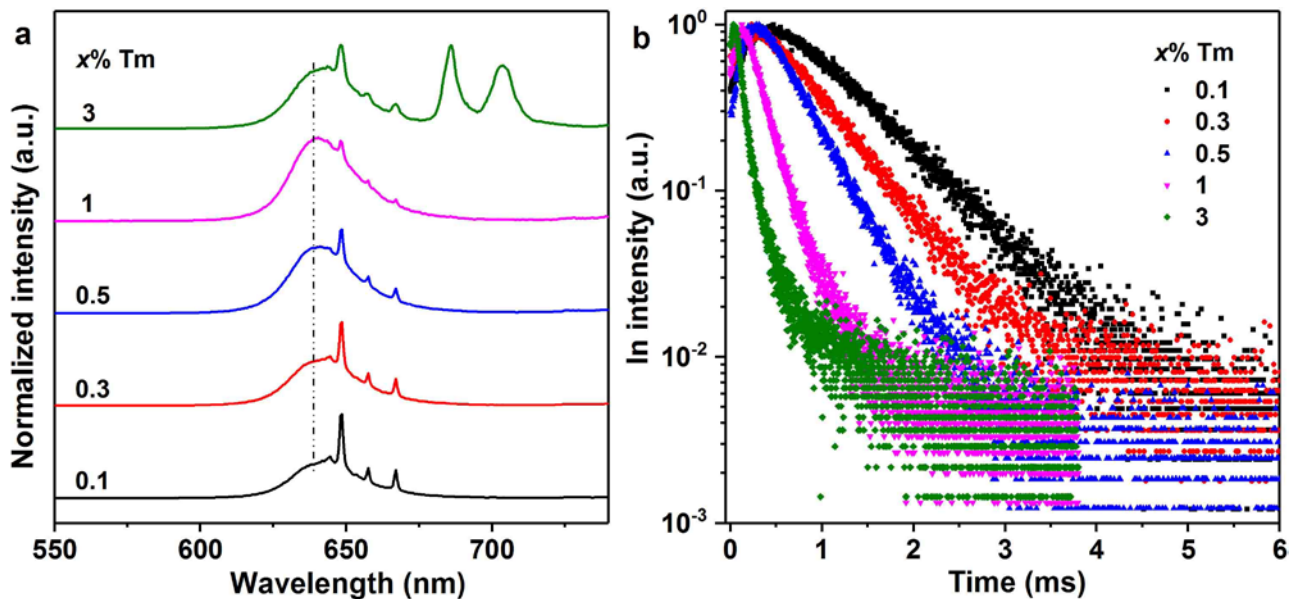

**Supplementary Figure 25.** **a** UCL spectra for NPs-sensitized CsPbBr<sub>1.5</sub>I<sub>1.5</sub> PeQDs with varying Tm<sup>3+</sup> concentration in the NPs under 980 nm CW diode laser excitation at a power density of 50 W cm<sup>-2</sup>. **b** The corresponding UCL decays from band-edge excitons of CsPbBr<sub>1.5</sub>I<sub>1.5</sub> by monitoring their emission at 630 nm under 980 nm excitation, showing tunable lifetimes from 840 μs to 100 μs as the Tm<sup>3+</sup> concentration increased from 0.1 mol% to 3 mol%. The red shift in the emission band of CsPbBr<sub>1.5</sub>I<sub>1.5</sub> QDs relative to that in Supplementary Fig. 15 is attributed to their increased particle size during their storage for one month. The rising edge in the initial stage of the decay curves reflects the slow population of the PeQDs excited state from the long-lived Tm<sup>3+</sup> excited state, as a result of radiative energy transfer from the NPs to CsPbBr<sub>1.5</sub>I<sub>1.5</sub> PeQDs. Note that the UCL signal in the beginning of the decay curves arising from two-photon absorption of CsPbBr<sub>1.5</sub>I<sub>1.5</sub> under 980 nm nanosecond-pulsed laser excitation had been deleted to guarantee the purity of the UCL signal from energy transfer.

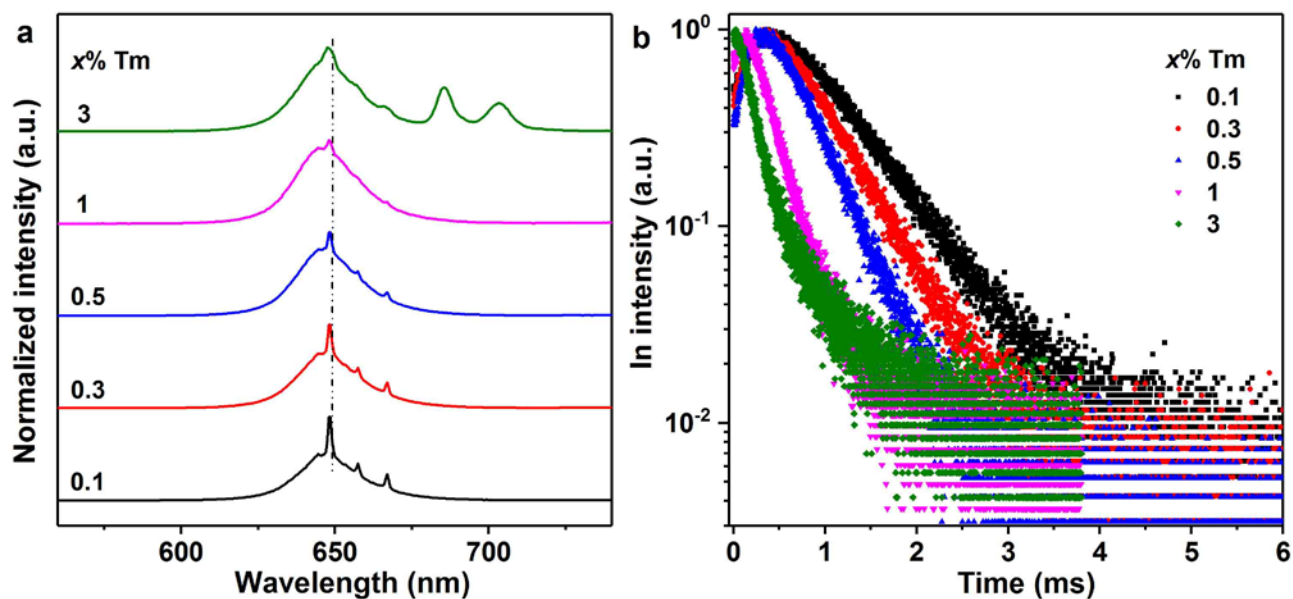

**Supplementary Figure 26.** **a** UCL spectra for NPs-sensitized CsPbBr<sub>1</sub>I<sub>2</sub> PeQDs with varying Tm<sup>3+</sup> concentration in the NPs under 980 nm CW diode laser excitation at a power density of 50 W cm<sup>-2</sup>. **b** The corresponding UCL decays from band-edge excitons of CsPbBr<sub>1</sub>I<sub>2</sub> by monitoring their emission at 657 nm under 980 nm excitation, showing tunable lifetimes from 727  $\mu$ s to 243  $\mu$ s as the Tm<sup>3+</sup> concentration increased from 0.1 mol% to 3 mol%. The rising edge in the initial stage of the decay curves reflects the slow population of the PeQDs excited state from the long-lived Tm<sup>3+</sup> excited state, as a result of radiative energy transfer from the NPs to CsPbBr<sub>1</sub>I<sub>2</sub> PeQDs. Note that the UCL signal in the beginning of the decay curves arising from two-photon absorption of CsPbBr<sub>1</sub>I<sub>2</sub> under 980 nm nanosecond-pulsed laser excitation had been deleted to guarantee the purity of the UCL signal from energy transfer.

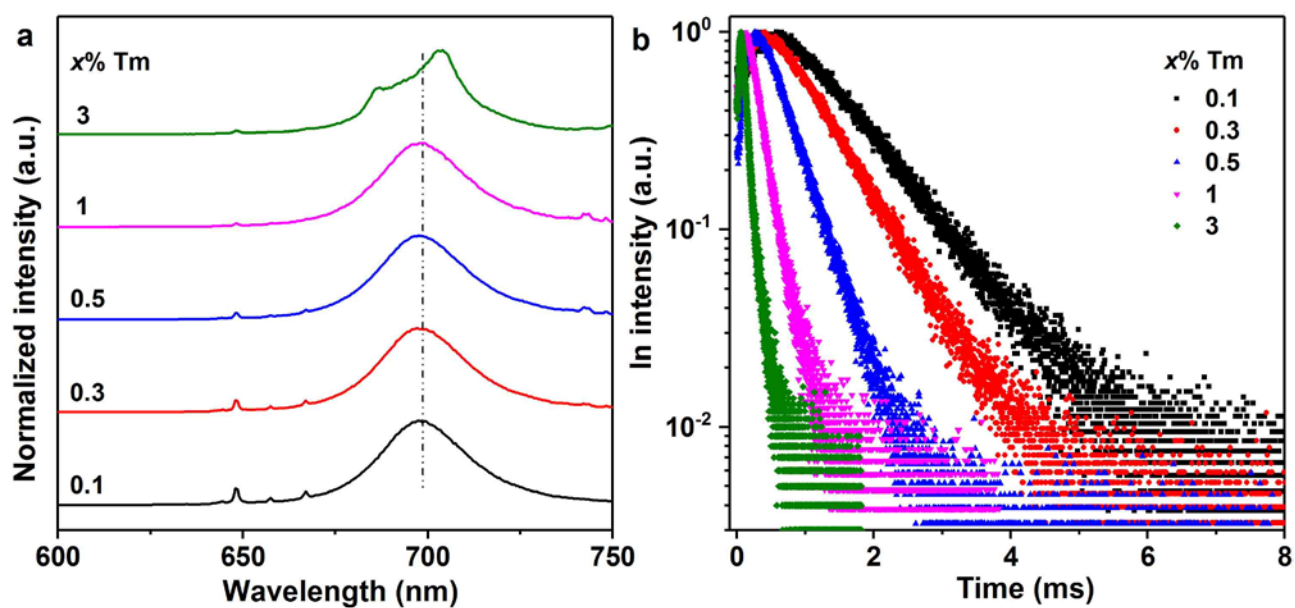

**Supplementary Figure 27.** **a** UCL spectra for NPs-sensitized CsPbI<sub>3</sub> PeQDs with varying Tm<sup>3+</sup> concentration in the NPs under 980 nm CW diode laser excitation at a power density of 50 W cm<sup>-2</sup>. **b** The corresponding UCL decays from band-edge excitons of CsPbI<sub>3</sub> by monitoring their emission at 700 nm under 980 nm excitation, showing tunable lifetimes from 1.053 ms to 80 μs as the Tm<sup>3+</sup> concentration increased from 0.1 mol% to 3 mol%. The rising edge in the initial stage of the decay curves reflects the slow population of the PeQDs excited state from the long-lived Tm<sup>3+</sup> excited state, as a result of radiative energy transfer from the NPs to CsPbI<sub>3</sub> PeQDs. Note that the UCL signal in the beginning of the decay curves arising from two-photon absorption of CsPbI<sub>3</sub> under 980 nm nanosecond-pulsed laser excitation had been deleted to guarantee the purity of the UCL signal from energy transfer.

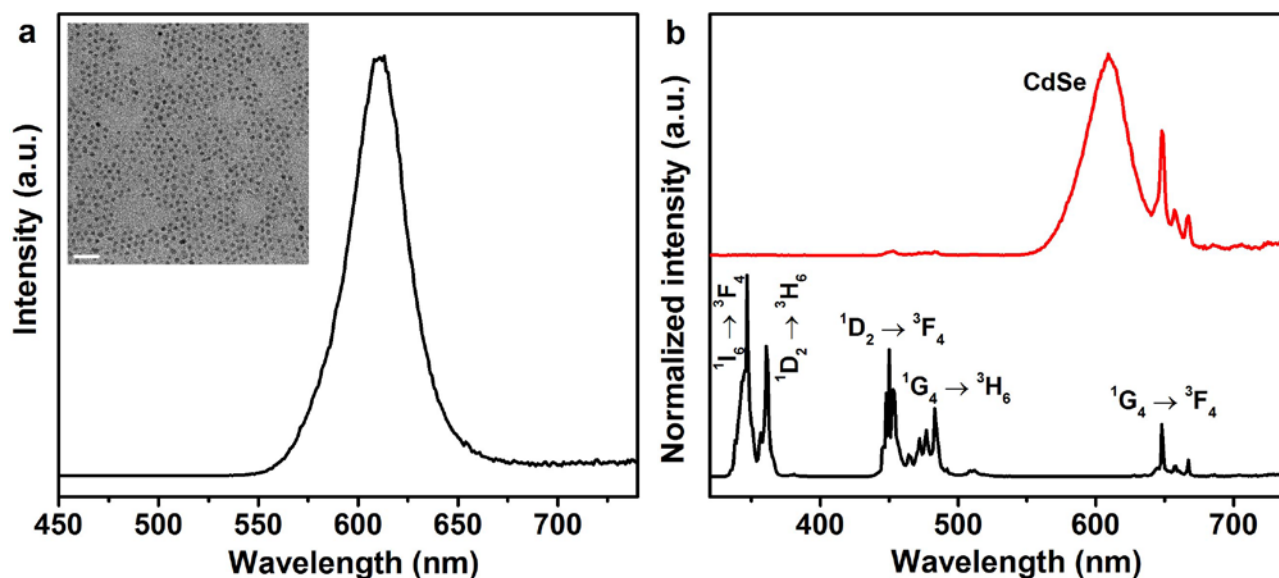

**Supplementary Figure 28.** **a** PL spectrum of CdSe quantum dots (QDs) under UV excitation at 365 nm. The inset shows the TEM image of CdSe QDs, indicating a mean size of ~4 nm. The scale bar represents 20 nm. **b** UCL spectra of LiYbF<sub>4</sub>:0.5%Tm<sup>3+</sup>@LiYF<sub>4</sub> core/shell NPs and the NPs-sensitized CdSe QDs under 980 nm CW diode laser excitation at a power density of 20 W cm<sup>-2</sup>. CdSe QDs were synthesized via a hot-injection method as previously reported by C. L. Yan *et al.* (Supplementary Ref. 4). The measurement sample was prepared by dispersing the NPs and the QDs in cyclohexane with concentrations of 1 and 2 mg mL<sup>-1</sup>, respectively. Under 980 nm excitation, the NPs-sensitized QDs displayed characteristic QDs exciton emission at 610 nm, while the UV and blue emissions of Tm<sup>3+</sup> from the NPs were completely quenched, as a result of radiative energy transfer from the NPs to the QDs.

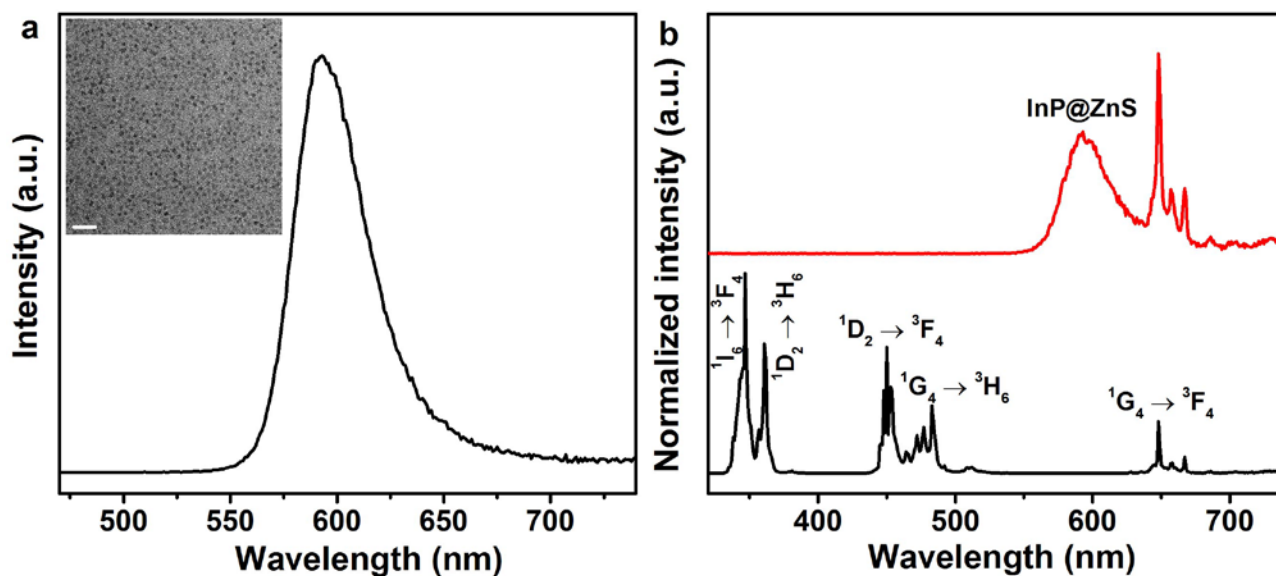

**Supplementary Figure 29.** **a** PL spectrum of InP@ZnS core/shell QDs under UV excitation at 365 nm. The inset shows the TEM image of InP@ZnS QDs, indicating a mean size of  $\sim 3$  nm. The scale bar represents 20 nm. **b** UCL spectra of LiYbF<sub>4</sub>:0.5%Tm<sup>3+</sup>@LiYF<sub>4</sub> core/shell NPs and the NPs-sensitized InP@ZnS QDs under 980 nm CW diode laser excitation at a power density of 20 W cm<sup>-2</sup>. InP@ZnS core/shell QDs were synthesized via a hot-injection method as previously reported by M. D. Tessier *et al.* (Supplementary Ref. 5). The measurement sample was prepared by dispersing the NPs and the QDs in cyclohexane with concentrations of 1 and 2 mg mL<sup>-1</sup>, respectively. Under 980 nm excitation, the NPs-sensitized QDs displayed characteristic QDs exciton emission at 590 nm, while the UV and blue emissions of Tm<sup>3+</sup> from the NPs were completely quenched, as a result of radiative energy transfer from the NPs to the QDs.

## Supplementary References

1. Zou, Q., *et al.* Cooperative and non-cooperative sensitization upconversion in lanthanide-doped LiYbF<sub>4</sub> nanoparticles. *Nanoscale* **9**, 6521-6528 (2017).
2. Boyer, J. & van Veggel, F. Absolute quantum yield measurements of colloidal NaYF<sub>4</sub>:Er<sup>3+</sup>,Yb<sup>3+</sup> upconverting nanoparticles. *Nanoscale* **2**, 1417-1419 (2010).
3. Würth, C., Grabolle, M., Pauli, J., Spieles, M. & Resch-Genger, U. Relative and absolute determination of fluorescence quantum yields of transparent samples. *Nat. Protoc.* **8**, 1535-1550 (2013).
4. Yan, C., Dadvand, A., Rosei, F. & Perepichka, D. Near-IR photoresponse in new up-converting CdSe/NaYF<sub>4</sub>:Yb,Er nanoheterostructures. *J. Am. Chem. Soc.* **132**, 8868-8869 (2010).
5. Tessier, M., Dupont, D., Nolf, K., Roo, J. & Hens, Z. Economic and size-tunable synthesis of InP/ZnE (E = S, Se) colloidal quantum dots. *Chem. Mater.* **27**, 4893-4898 (2015).
